# Supplementary material for: Increased level of FAM19A5 is associated with cerebral small vessel disease and leads to a better outcome
Source: PeerJ. 2022 Mar 8;10:e13101. doi: 10.7717/peerj.13101 (PMC8916029; doi:10.7717/peerj.13101)
Supplement: Supplemental Information 1 — The correlation between CSVD and FAM19A5. [file peerj-10-13101-s001.xlsx]

## Sheet: number code book
categorical data number code
variable	Code	meaning
Sex	1	Female
	2	Male
hypertension	0	absence
	1	presence
diabete	0	absence
	1	presence
smoking	0	absence
	1	presence
drinking	0	absence
	1	presence

## Sheet: RSSI
CSVD				burden	VOLUME				NIHSS（admission）	NIHSS14days	deltaNIHSS	NIHSSimprovement	FAM19A5	hospital ID	sex（1F/2M）	age	disease histoyy		personal history
lacune（0/1）	WMH（Fazekas分级）	CBM	EPVS number		A（mm）	B（mm）	C/0.5	volume									hypertension	diabete	smoking	drinking	TG （0.3-1.92）mmol/L	TC （2.32-5.62）mmol/L	HDL （0.8-1.8）mmol/L	LDL （1.9-3.12）mmol/L	Glu （3.9-6.16）mmol/L	BUN （2.14-7.14）mmol/L	UA	WBC
0	1	0	17	1	0.485	0.345	1	0.0418312	1	0	1	1	69.8335	0005064980	1	54	0	0	0	0	1.44	5	1.58	3.09	4.88	4.79	193	3.85
1	2		36	3	0.546	0.447	1	0.0610155	0	0	0	#DIV/0!	285.782	0003416439	2	65	1	0	0	0	0.97	4.5	1.23	3.23	6.02	6.43	469	6.68
1	3		22	3	2.79	1.733	5	6.04384	8	8	0	0	1059.09	0005050431	2	70	1	0	0	0	0.91	2.93	1.1	1.63				4.49
1	1	0	12	2	0.409	0.339	2	0.0693255	0	0	0	#DIV/0!	62.7445	0005123479	2	48	1	0	1	1	1.68	5	1.2	3.67	4.4	5.39	346	6.75
1	3	0	46	3	0.811	0.609	2	0.24695	8	7	1	0.125	344.884	0005296045	1	79	1	0	0	0	1.54	2.99	0.95	1.61	4.84	3.4	251	4.23
1	2	0	25	3	1.265	1.029	3	0.976264	7	7	0	0	606.988	0005373001	2	51	1	0	0	0	0.85	2.88	0.78	1.65	5.12	5.4		7.11
1	3	0	34	3	1.549	0.632	1	0.244742	1	1	0	0	1372.32	0003134274	1	76	1	1	0	0	2.69	4.78	1.09	2.85	8.69	7.28	487	10.56
1	1	0	11	2	0.957	0.493	2	0.2359	7	7	0	0	209.66	0001758160	2	55	1	0	1	1	1.71	5.51	1.06	3.75	5.63	5.74	281	8.45
0	1	0	41	1	1.813	0.967	2	0.876585	8	8	0	0	2297.46	0005403752	1	63	1	0	0	0	1.36	4.89	1.13	2.83	6.31	5.86	376	7.32
0	1	0	11	1	1.559	0.916	3	1.07103	4	3	1	0.25	5209.03	0005377900	2	62	1	0	0	0	1.33	3.9	1.28	2.2	4.09	5.23	194	5.91
0	2	0	25	1	2.258	1.216	5	3.43216	6	0	6	1	3041.11	0005438210	1	60	1	0	0	0	1.38	4.09	1.54	2.27	5.78	4.38	296	8.56
1	1	0	24	2	1.63	0.726	4	1.18338	8	8	0	0	365.543	0005445735	2	60	0	1	0	0	1.07	3.42	1.32	1.86	6.92	5	391	6.80
0	1	0	6	0	1.622	1.234	1	0.500387	4	3	1	0.25	113.695	0005451986	1	76	1	0	0	0	0.82	3.63	1.29	2.21	5.57	4.11	319	5.51
0	2	0	12	1	5.304	4.521	6	35.9691	0	0	0	#DIV/0!	5477.77	0005356645	2	79	0	0	0	0	0.98	3.19	1.25	1.71	4.91	4.27	336	7.28
1	1	0	17	2	0.807	0.752	3	0.455148	2	2	0	0	2878.35	0004252498	2	47	1	1	1	0	2.8	5.16	1.08	3.25	8.63	5.58	332	9.74
1	1	0	12	2	1.1	0.725	3	0.598125	5	4	1	0.2	163.141	0005486867	1	62	1	1	0	0	0.85	4.47	1.51	2.45	11.24	4.75	264	6.61
1	2	0	36	3	1.669	0.815	3	1.02018	0	0	0	#DIV/0!	420.328	0005494506	2	54	1	1	0	0	1.68	4.15	0.89	2.51	10.44	3.96	260	6.69
1	2	0	32	3	0.471	0.277	3	0.0978502	1	1	0	0	270.551	0002649894	2	81	0	0	1	1	1.35	3.47	1.33	1.77	4.58	3.91	272	5.31
1	1	0	33	3	2.079	1.065	2	1.10707	4	5	-1	-0.25	86.7744	0005518052	2	75	1	0	0	0	1.21	3.3	1.38	1.51	4.71	4.54	214	3.45
0	1	0	11	1	1.607	1.015	3	1.22333	10	9	1	0.1	276.707	0005538916	2	62	1	0	0	0	1.01	3.87	1.01	2.01	4.64	4.17	242	6.95
0	2		22	2	1.073	0.658	2	0.353017	3	2	1	0.333333	860.911	0005559402	2	40	1	0	0	1	3.42	7.81	1.17	4.97	5.8	3.42	388	6.69
0	1	0	10	0	0.786	0.712	2	0.279816	0	0	0	#DIV/0!	618.94	0005594025	2	55	0	0	1	1	1.88	4.12	1.15	2.53	6.7	5.46	386	6.26
1	3	0	46	3	0.982	0.466	1	0.114403	2	0	2	1	756.623	0005608597	2	61	0	0	1	0	0.81	3.21	1.24	1.97	5.91	4.53	397	6.21
1	1	0	12	2	0.456	0.45	1	0.0513	0	0	0	#DIV/0!	304.162	0005615362	1	59	0	0	1	1	1.26	4.29	1.28	2.61	4.99	6.41	284	7.46
1	1	0	30	3	1.174	0.772	2	0.453164	1	1	0	0	43.2659	0005630594	1	62	1	0	0	0	1.12	4.01	1.6	2.27	5.55	3.84	109	6.22
0	1	0	9	0	2.083	1.402	2	1.46018	6	6	0	0	106.094	0000914711	2	52	1	1	0	1	1.58	2.46	0.86	1.24	7.72	5.1	265	6.16
0	3		16	2	1.553	0.847	1	0.328848	3	0	3	1	310.528	0005518027	2	87	1	0	0	0	0.89	2.58	1.58	0.93	4.88	4.69	272	5.46
0	1		32	1	1.413	1.216	4	1.71821	6	4	2	0.333333	1057.91	0002205398	2	58	1	0	1	1	1.27	5.31	1.22	3.48	4.91	5.13	287	7.86
1	2		25	3	0.779	0.669	3	0.390863	0	0	0	#DIV/0!	176.152	5929030	2	83	0	0	0	1	1.01	4.92	1.41	3.05	4.81	5.63	254	5.91
0	1		12	1	1.591	0.643	4	1.02301	1	1	0	0	64.5164	5931651	2	44	0	0	0	0	0.59	4.04	1.77	1.95	4.09	5.04	185	4.9
1	3		36	3	2.733	1.501	5	5.12779	3	3	0	0	5203.24	5938564	1	70	1	1	0	0	0.76	4.87	1.56	2.94	8.15	7.18	321	5.02
0	2		5	1	1.254	1.007	2	0.631389	9	9	0	0	575.885	5926162	1	52	1	0	0	0	2.13	5.45	0.99	3.63	4.15	3.86	463	2.55
1	2		22	3	1.389	0.868	5	1.50706	10	10	0	0	302.097	4814899	2	75	0	0	0	0	0.97	5.74	1.2	4.11	4.21	9.74	453	8.74
0	1		14	1	0.457	0.214	1	0.0244495	0	0	0	#DIV/0!	307.76	5024367	2	68	0	0	0	0	0.76	4.59	1.47	2.55	4.49	4.96	259	5.25
1	1		32	2	1.854	1.366	4	2.53256	5	5	0	0	286.493	723852	2	56	1	1	0	0	1.19	3.54	1.11	2.07	2.94	4.9	643	7.51
1	3		26	3	1.332	1.035	2	0.68931	6	5	1	0.166667	5316.02	5568869	2	60	1	1	0	0	1.58	5.51	1.53	3.45	8.45	6.47	236	6.16
1	2		16	3	1.248	0.796	2	0.496704	2	0	2	1	1542.67	5401225	2	60	0	1	0	0	0.68	4.13	1.07	2.81	7.98	5.37	337	5.82
1	2		10	2	1.159	0.433	2	0.250924	0	0	0	#DIV/0!	154.95	3982509	2	76	1	0	0	0	1.7	5.09	1.27	3.12	9.95	6.28	271	4.39
1	1		8	1	1.779	0.587	3	0.783205	1	1	0	0	72.3941	5931651	2	44	0	0	0	0	0.47	3.06	1.67	1.12	4.28	4.69	202	4.55
1	2	18	22	4	1.477	0.581	3	0.643603	5	5	0	0	168.024	5983379	1	62	1	0	0	0	0.91	3.52	1.28	1.86	5.16	5.33	365	4.85
0	1		11	1	0.981	0.343	3	0.252362	2	1	1	0.5	77.9041	5973082	2	60	0	1	1	1	0.94	3.13	1.19	1.55	6.51	8.52	377	7.47
0	1		9	0	1.321	0.336	2	0.221928	0	0	0	#DIV/0!	194.255	4145519	1	59	1	0	0	0	1.07	5.81	1.73	3.48	5.79	3.56	224	6.16
0	1		7	0	2.234	1.348	4	3.01143	7	7	0	0	187.476	3962227	1	64	0	0	0	0	0.85	4.15	1.39	2.31	4.85	3.04	190	4.63
1	2		22	3	1.779	0.963	2	0.856588	3	3	0	0	429.594	5785754	2	69	0	0	1	1	1.12	6.17	1.66	4.06	5.68	4.54	371	5.46
1	3	5	37	4	1.15	5.34	1	1.53525	0	0	0	#DIV/0!	1361	5999210	1	50	1	0	0	0	1.26	3.14	1.53	1.26	4.32	3.98	262	4.73
0	1		10	0	1.665	0.903	3	1.12762	3	3	0	0	226.794	5999971	1	47	1	0	0	0	1.69	4.57	1.22	2.8	4.95	4.89	276	6.25
1	1		9	1	0.764	0.286	1	0.054626	3	4	-1	-0.333333	194.602	6004074	2	60	1	1	0	0	1.13	3.68	1.08	2.24	7.94	6.97	493	8
1	2		10	2	1.212	1.212	1	0.367236	1	0	1	1	462.762	6012850	1	63	0	1	0	0	1.77	6.15	1.37	4.13	18.42	7.24	341	4.65
1	2		6	2	1.529	0.896	3	1.02749	5	4	1	0.2	218.334	5349299	1	44	1	0	0	0	1.36	4.21	1.23	2.48	5.73	6.32	371	10.06
0	1		18	1	1.652	0.865	2	0.71449	3	1	2	0.666667	7131.27	4520303	2	69	1	0	1	0	0.99	4.69	1.14	3.04	5.49	7.95	354	7.46
0	1		14	1	1.769	1.147	2	1.01452	4	6	-2	-0.5	299.165	1928606	2	77	1	1	0	0	0.96	5.21	1.6	3.07	7	6.6	456	5.22
1	3		32	3	0.824	0.481	2	0.198172	6	4	2	0.333333	5671.73	3095071	2	71	1	0	0	0	1.32	4.65	1	3.04	5.21	5.23	388	5.05
1	3		15	3	0.887	0.808	2	0.358348	4	3	1	0.25	599.168	3871762	2	75	1	0	0	0	2.29	5.9	1.39	3.44	7.59	11.1	448	11.55
1	3	4	15	4	0.987	0.828	2	0.408618	7	8	-1	-0.142857	266.569	6055027	2	52	1	0	1	0	1.15	4.98	1.03	3.35	4.73	3.23	332	10.03
1	1		5	1	1.114	0.641	4	0.714074	9	7	2	0.222222	324.637	6055049	2	57	0	0	1	0	2.36	4.51	1.25	2.42	5.34	4.96	415	7.65
0	2		13	2	0.468	0.293	1	0.034281	4	3	1	0.25	127.174	6078912	2	62	1	0	1	1	0.61	4.6	1.3	2.98	5.07	4.81	436
0	3		17	2	0.567	0.56	1	0.07938	0	0	0	#DIV/0!	4479.26	6079618	2	59	0	0	0	1	0.58	3.48	1	2.21	5.44	5.07	487	5.74
1	1		12	2	1.813	0.947	2	0.858455	2	0	2	1	291.573	6089995	1	73	1	1	0	0	1.46	5.3	1.29	3.49	6.55	7.58	280	5.79
0	1		27	1	1.406	0.83	3	0.875235	4	3	1	0.25	2224.58	6087704	2	67	0	1	1	0	1.93	2.8	1.32	1.1	18.22	6.7	223	7.64
1	3	2	12	4	0.86	0.576	2	0.24768	4	4	0	0	199.963	1866145	2	68	1	0	1	1	0.82	2.51	1.15	1.12	4.9	3.88	250	2.7
1	2		17	3	0.527	0.427	2	0.112515	0	0	0	#DIV/0!	239.728	2156333	2	76	1	0	0	0	2.63	3.59	0.99	2.01	5.85	10.51	383	6.6
0	1		3	0	1.924	1.351	5	3.24915	3	3	0	0	53.8877	5812108	2	33	0	0	1	1	1.79	4.84	1.13	3.16	5	5.38	474	7.61
0	1		18	1	0.578	0.198	1	0.028611	2	2	0	0	342.668	6034215	2	48	1	1	1	0	4.76	6.2	1.31	3.49	10.53	7.48	533	12.08
1	2		20	3	0.725	0.468	2	0.16965	1	0	1	1	115.989	6106509	1	60	1	1	0	0	1.74	4.68	1.59	2.61	8.81	4.31	221	4.6
1	2	0	34	3	1.007	0.876	3	0.661599	1	1	0	0	3123.42	185790	2	71	0	1	1	0	1.45	3.53	1.02	2.08	12.06	5.79	282	5.22
1	2		21	3	2.18	0.968	5	2.6378	0	0	0	#DIV/0!	388.89	1974462	1	77	1		0	0	1.1	2.63	1.67	0.75	4.82	3.62	282	5.98
1	2	3	15	4				0	2	1	1	0.5	165.25	1915943	2	68	0	0	1	0	1.67	4.27	1.4	2.35	5.06	6.06	375
1	2	21	24	4	1.51	0.477	2	0.360135	5	5	0	0	511.566	5685098	2	70	1	0	1	1	1.32	2.98	1.21	1.43	5.6	9.9	422	7.08
1	3	19	31	4	0.633	0.336	1	0.053172	0	0	0	#DIV/0!	3797.66	5792043	2	54	1	0	1	1	0.53	2.12	1.02	0.9	4.49	3.97	299	5.09
0	1	3	5	1	1.958	0.891	4	1.74458	10	8	2	0.2	99.3613	6149950	1	54	0	0	0	0	1.52	4.45	1.25	2.77	5.67	4.85	236	5.27
1	2		6	2	2.749	1.198	5	4.11663	7	9	-2	-0.285714	65.9903	6160617	1	64	1	1	0	0	0.65	4.96	1.63	2.85	7.95	4.25	362	4.51
0	1		8	0	1.613	0.963	2	0.776659	7	5	2	0.285714	71.0889	0006160143	2	67	1	1	1	1	1.68	5.24	1.29	3.13	9.14	6.07	259	7.37
1	2		19	3	1.13	0.695	2	0.392675	8	5	3	0.375	590.815	6167650	1	66	1	1	0	0	2.15	4.2	1.5	2.13	5.36	7.5	515	6.11
0	2	0	31	2	1.332	1.11	3	1.10889	0	0	0	#DIV/0!	6875.28	6110225	2	71	1	1	0	0	0.87	4.19	1.23	2.69	6.53	5.65	297	7.11
1	3		41	3	1.289	0.894	2	0.576183	3	0	3	1	229.718	2607651	2	76	1	0	0	0	0.74	4.54	1.2	2.66	4.33	6	331	6
1	1	17	6	2	0.897	0.677	3	0.455452	0	0	0	#DIV/0!	103.709	6184644	2	37	1	0	0	0	0.68	2.02	0.89	1.04	5.08	5.69	536	7.2
0	1		6	0	1.576	0.995	3	1.17609	5	4	1	0.2	101.343	0006225895	1	52	1	0	0	0	1.19	4.44	1.65	2.21	4.75	6.63	188	5.6
1	1		10	1	0.445	0.285	1	0.0317062	0	0	0	#DIV/0!	80.9002	0002877575	2	67	1	1	0	0	3.77	3.48	1.16	1.69	11.36	6.74	185	7.5
1	1		13	2	1.835	1.105	1	0.506919	5	4	1	0.2	282.612	0006254385	2	62	0	0	1	0	0.46	3.92	1.53	1.86	9.94	5.91	280	11.31
1	1		12	2	0.299	0.299	1	0.0223502	3	3	0	0	167.232	0000963991	1	62	1	1	0	0	1.85	3.45	1.11	1.67	5.76	5.13	297	7.22
0	1		12	1	1.861	0.86	2	0.80023	4	4	0	0	39.3692	0003481778	2	69	0	0	1	1	0.56	5.36	1.94	2.99	5.35	4.67	403	5.58
0	2		27	1	1.43	0.439	1	0.156942	0	0	0	#DIV/0!	1209.31	0003575582	1	72	1	0	0	0	1.7	4.51	1.17	2.57	5.28	5.24	342	5.88
1	1		20	2	1.881	0.701	1	0.329645	0	0	0	#DIV/0!	96.0506	0004091531	1	62	1	0	0	0	1.55	5.18	1.36	3.02	4.77	4.95	390	5.37
1	2		13	3	1.106	0.899	1	0.248574	5	5	0	0	212.177	0004358928	2	59	0	0	1	1	1.33	5.35	1.62	3.11	5.7	5.99	296	6.6
0	2		21	2	0.687	0.384	2	0.131904	4	4	0	0	389.627	0006338864	2	68	0	0	1	1	0.36	3.86	1.79	1.58	5.75	4	185	7.95
1	1		5	1	1.664	0.919	4	1.52922	2	0	2	1	312.959	0006362555	2	38	0	0	0	1	1.22	4.32	1	2.99	4.03	5	391	6.14
1	1	0	10	1	1.63	1.083	2	0.882645	3	0	3	1	111.644	0006371614	2	65	1	0	0	0	1.25	4.69	1.28	2.78	7.85	7.42	321	4.82
1	2	0	14	2	1.39	0.822	2	0.57129	1	0	1	1	588.782	0004194286	2	64	1	0	0	0	1.24	4.1	1.13	2.39	4.33	5.89	327	6.08
1	2		18	3	0.556	0.359	1	0.049901	0	0	0	#DIV/0!	182.895	0002156333	2	77	1	0	0	0	0.97	2.55	0.93	1.3	5.01	7.67	254	6.01
1	1	0	11	2	1.506	0.609	3	0.687866	0	0	0	#DIV/0!	699.338	0002595950	1	81	0	0	0	1	0.81	4.62	1.5	2.47	4.05	7.59	273	8.84
1	2		15	3	0.881	0.479	2	0.211	5	2	3	0.6	391.713	0006391765	2	61	1	0	0	0	2.01	4.3	1.12	2.52	4.7	5.32	246	8.28
1	2		9	2	1.406	0.705	2	0.495615	11	10	1	0.0909091	123.426	0006399697	2	48	1	0	1	1	1.67	3.5	0.94	2.02	7.89	4.42	294	6.18
0	1		5	0	0.695	0.541	2	0.187998	0	0	0	#DIV/0!	274.414	0005980381	1	65	1	1	0	0	1.31	3.83	1.32	1.9	9.46	5.57	211	6.24
0	2		25	2	1.441	0.592	2	0.426536	8	1	7	0.875	5149.36	0006495827	2	56	0	0	1	1	3.05	5.59	1.9	2.09	15.68	6.49	393
0	1		22	0	0.94	0.631	2	0.29657	2	1	1	0.5	461.02	6685647	2	57	1	0	1	1	1.87	4.96	1.15	3.19	6.33	90	355	5.74
1	2		23	3	1.862	1.586	3	2.21485	14	9	5	0.357143	682.433	6684056	1	73	1	0	0	0	0.87	3.35	1.08	1.83	5.41	83	240	7.91
0	1		12	1	1.392	0.915	1	0.31842	3	1	2	0.666667	179.571	6450766	2	67	0	0	1	1	0.69	3.39	1.77	1.29	4.62	77	247	6.24
1	2		8	2	1.818	1.13	2	1.02717	9	5	4	0.444444	5312.35	6697694	1	60	0	0	0	0	2.56	5.55	1.66	2.86	5.33	71	211	6.2
1	1		25	2	1.239	0.641	1	0.19855	2	1	1	0.5	372.95	4476698	2	70	1	0	0	0	0.84	4.16	1.39	2.41	5.93	101	430
1	1		10	1	0.762	0.695	2	0.264795	2	2	0	0	76.1459	6708971	1	63	0	1	0	0	1.47	4.97	1.3	3.13	5.01	80	194	5.69
1	3		27	3	2.67	1.06	3	2.12265	2	2	0	0	742.909	1457229	1	64	1	0	0	0	2.6	4.73	1.35	2.53	4.47	89	468	4.55
1	1		27	2	0.598	0.203	1	0.0303485	2	2	0	0	577.648	271788	2	73	0	1	1	1	1.47	5.21	1.08	3.66	5.17	76	260	7.37
1	2		14	3	1.182	0.609	3	0.539878	2	0	2	1	381.14	1937075	1	54	1	1	0	0	8.1	4.46	1.07	0.71	6.87	137	318	7.93
1	1		41	2	1.089	0.509	2	0.277151	2	2	0	0	105.811	1536142	2	88	1	0	1	1	0.8	5.47	1.62	3.72	6.22	101	325	6.64
0	1		9	0	1.037	0.679	3	0.528092	4	2	2	0.5	159.158	6544153	2	55	0	1	0	0	1.07	2.82	0.83	1.87	3.57	79	377	8.78
0	1		11	0	1.709	0.909	1	0.38837	1	1	0	0	207.078	6738230	1	57	1	0	0	0	2.34	3.73	1.23	2.15	4.72	78	326	7.13
0	1	0	9	0	0.465	0.317	1	0.0368513	0	0	0	#DIV/0!	195.638	0001939273	1	58	1	0	0	0	1.15	4.07	0.99	2.76	5.4	3.81	260	8.06
0	1	0	5	0	1.43	0.557	4	0.79651	4	2	2	0.5	60.8093	0005200514	1	54	1	0	0	0	0.62	3.09	2.69	1.23	4.32	3.03	200	6.03
0	1	0	5	0	0.859	0.767	2	0.329427	2	2	0	0	225.562	0005232310	2	50	1	0	0	0	1.17	3.62	1.11	2.12	4.35	4.65	424	6.21
0	1	0	9	0	0.896	0.476	2	0.213248	1	6	-5	-5	85.0164	0001689558	1	72	1	0	0	0	0.66	5.19	1.79	2.96	4.89	3.39	209	4.68
0	3	0	15	2	0.732	0.726	1	0.132858	2	2	0	0	200.696	0002258083	2	70	1	1	1	0	2.22	3.65	0.93	2.19	7.13	5.74	321	9.02
1	3	10	43	4	0.712	0.553	1	0.098434	2	2	0	0	374.8	0004421592	2	76	1	1	1	0	1.78	2.37	0.85	1.27	10.83	5.18	233	4.65
1	1	0	4	1	0.866	0.507	1	0.109766	0	0	0	#DIV/0!	245.807	0002977047	2	48	0	0	1	0	1.11	3.38	0.93	2.2	5.8	3.75	267	7.99
1	1	0	14	2	0.465	0.722	3	0.251798	5	5	0	0	119.765	0005286922	2	76	0	0	1	1	0.89	3.18	1.16	1.67	7.99	6.46	293	6.51
0	1	0	12	2	1.152	0.521	2	0.300096	0	0	0	#DIV/0!	268.693	0004979879	2	67	0	0	1	1	2.68	5.2	0.9	3.32	5.46	6.95	378	7.68
1	2	20	26	4	1.395	1.078	2	0.751905	5	5	0	0	112.675	0004454706	1	69	1	0	0	0	0.81	4.07	1.4	2.21	4.34	3.26	399	5.97
1	3		19	3	1.663	0.781	5	1.6235	2	1	1	0.5	322.386	0003462594	1	69	1	0	0	0	1.15	4.1	1.11	2.64	4.95	3.08	226	5.54
1	2	4	41	4	2.687	1.191	3	2.40016	9	6	3	0.333333	123.862	0005345771	1	69	1	0	0	0	1.49	4.67	1.31	2.73	6.57	4.98	376	6.5
1	1	0	5	1	1.512	1.099	4	1.66169	4	2	2	0.5	110.843	0003793593	2	30	1	1	0	0	1.6	4	0.82	2.54	6.99	4.65	517	10.42
1	1	0	28	2	1.331	0.795	2	0.529073	4	1	3	0.75	309.143	0003482882	2	62	1	0	1	1	2.44	5.19	0.98	3.3	6.04	3.59	421	5.53
0	1	0	11	1	0.368	0.368	1	0.033856	0	0	0	#DIV/0!	242.947	0004824139	2	63	0	0	1	0	1.33	3.52	0.85	2.34	4.92	6.03	325	7.7
1	2	1	10	2	1.353	0.96	2	0.64944	4	1	3	0.75	1241.55	0004001588	2	50	0	0	0	0	0.83	3.35	1.01	2.04	5.69	5.87	276	4.74
1	1	0	10	1	1.71	0.89	3	1.14142	8	7	1	0.125	129.835	0005398949	1	57	1	0	0	0	0.96	3.54	0.96	2.22	4.94	3.59	294	7.51
0	1	0	11	1	1.217	0.723	2	0.439945	5	5	0	0	734.417	0005398549	1	60	1	0	0	0	1.03	4.97	1.39	3.23	5.91	5.51	306	8.03
0	1	0	15	1	0.604	0.465	1	0.070215	4	4	0	0	20.9111	0003368022	1	52	1	1	0	0	4.17	4.4	1.12	2.55	9.35	8.34	438	5.41
1	2		12	3	0.867	0.451	2	0.195509	5	2	3	0.6	443.784	0005425785	2	40	0	0	0	0	1.4	4.3	0.93	2.99	7.01	5.1	509	10.19
0	0		2	0	0.903	0.471	2	0.212656	3	2	1	0.333333	77.0175	0005421521	2	50	1	0	0	0	1.26	4.76	0.97	3.1	5.08	4.79	378	5.61
0	1		6	0	1.151	1.112	2	0.639956	1	0	1	1	87.1486	0001278075	2	33	0	0	0	0	3.11	4.83	0.89	3.23	5.28
1	1		3	1	0.628	0.493	3	0.232203	2	0	2	1	74.3855	0005098513	2	47	0	1	0	0	1.9	2.94	0.99	1.64	10.27	4.36	290	7.16
0	2		4	1	1.497	0.395	1	0.147829	2	1	1	0.5	110.694	0000643779	2	67	1	0	1	1	0.52	5.23	2.08	2.49	5.21	8.44	264	6.9
1	2		37	3	0.894	0.511	1	0.114209	1	0	1	1	412.828	0004917932	2	65	0	0	1	1	0.66	4.87	1.81	2.43	4.43	4.91	372	8.26
1	2	0	9	2	1.085	0.593	2	0.321702	3	1	2	0.666667	86.6112	0005437604	2	70	1	0	1	0	0.71	5.84	1.34	3.82	5.23	4.44	400	4.04
0	2		26	2	0.242	0.397	2	0.048037	2	1	1	0.5	275.075	0002416102	2	52	0	0	0	0	0.54	3.15	1.07	1.95	5.25	5.56	359	8.72
0	1		22	1	0.762	0.439	2	0.167259	2	1	1	0.5	1871.38	0002610016	2	61	1	0	1	1	1.82	4.42	0.89	3.19	4.59	3.84	352	4.85
0	1	0	12	1	1.948	1.032	5	2.51292	7	4	3	0.428571	56.5612	0005453595	2	63	1	0	0	0	1.44	4.1	1	2.73	6.62	4.33	190	5.55
0	2		8	1	1.332	0.855	4	1.13886	6	4	2	0.333333	147.47	0005451472	1	58	1	1	0	0	5.21	5.72	0.86	3.04	6.25			6.12
1	1		7	1	1.177	0.369	1	0.108578	2	1	1	0.5	82.5275	0005454731	2	57	1	0	0	0	0.79	4.89	1.4	3.23	5.07	3.45	233	6.86
0	2		12	1	1.077	0.655	2	0.352718	5	4	1	0.2	657.075	0005457538	2	55	0	0	1	0	1.59	4.48	1.27	2.84	5.77	5.58	259
0	2		36	2	1.118	0.684	2	0.382356	1	1	0	0	132.125	0005388285	2	69	1	0	0	0	0.84	4.12	0.9	2.75	6.6	5.44	264	6.2
0	1	4	8	1	1.253	0.855	2	0.535657	2	2	0	0	74.1655	0003543100	2	52	0	0	1	1	0.64	2.25	0.81	1.27	5.09	3.88	320	6.4
0	1	1	15	2	1.265	0.759	2	0.480067	13	10	3	0.230769	106.293	0001402552	2	72	1	1	0	0	1.48	3.8	0.85	2.53	8.41	9.55	367	5.68
0	1	5	19	2	1.132	0.407	3	0.345543	4	2	2	0.5	712.982	0002714236	1	62	1	0	0	0	0.79	7.39	1.32	5.57	5.18	3.33	243	5.13
1	2	0	40	3	0.969	0.89	2	0.431205	1	0	1	1	333.169	0001585066	2	55	0	1	0	0	1.51	5.19	0.87	3.53	6.63	5.84	271	6.08
0	0		10	1	1.289	0.489	1	0.15758	0	0	0	#DIV/0!	120.377	0000590166	2	54	1	0	0	0	0.86	4.48	1.19	2.8	4.84	5.28	340	5.55
1	1	0	8	1	1.289	0.489	1	0.15758	8	7	1	0.125	166.368	0005497924	2	44	1	0	0	0	1.03	3.4	0.88	2.22	5.15	5.38	362	8.62
1	3	0	18	3	3.772	1.343	4	5.0658	2	2	0	0	7962.53	0000142854	1	51	1	1	0	0	0.45	2.27	1.28	0.76	6.3	5.2	170	1.26
0	3		26	2	1.154	0.546	3	0.472563	0	0	0	#DIV/0!	563.785	0003178441	2	62	1	0	1	1	0.92	4.82	1.66	2.57	5.71	5.57	354	6.09
1	3		18	3	0.901	0.63	2	0.283815	2	1	1	0.5	4079.14	0005550858	1	53	1	0	0	0	0.76	3.34	0.98	2.07	5.15	4.36	256	5.83
1	3	0	20	3	1.248	1.197	1	0.373464	4	2	2	0.5	369.682	0002894663	1	74	1	0	0	0	3.4	5.34	1.13	3.43	4.63	4.69	243	6.66
0	1	0	2	0	0.329	0.311	1	0.0255798	1	1	0	0	23.333	0001837488	1	68	1	1	0	0	1.24	4.98	1.48	3.13	12.22	7.26	172	4.42
1	3	9	55	4	0.558	0.261	2	0.072819	1	1	0	0	804.304	0005573328	1	66	1	0	0	0	1.69	4.69	1.35	2.81	5.04	5.46	332	4.43
1	1		10	1	1.167	0.809	2	0.472052	9	7	2	0.222222	322.074	0001341402	2	42	1	0	0	0	1.64	5.17	1.15	3.15	9.22	7.04	324	7.73
1	1	0	19	2	1.128	0.701	1	0.197682	4	3	1	0.25	218.544	0001524719	2	74	0	0	1	1	1.02	4.31	1.09	2.63	4.67	3.96	293	5.5
0	1	0	18	1	2.204	1.42	4	3.12968	3	2	1	0.333333	1366.98	0005584812	1	61	0	0	0	0	1.78	6.62	1.56	4.09	4.51	4.65	249	7.77
0	1		11	1	0.873	0.476	1	0.103887	0	0	0	#DIV/0!	2039.91	0005581804	2	69	0	0	0	0	1.62	4.97	0.98	3.18	4.54	4.78	279	7.01
1	2	0	14	3	0.677	0.53	1	0.0897025	2	2	0	0	119.937	0005586525	2	63	1	0	1	0	0.67	3.7	0.95	2.35	4.68	3.38	107	4.51
1	1	1	4	2	1.015	0.574	2	0.291305	2	2	0	0	2697.43	0005590340	2	55	1	0	1	1	1.19	4.11	1.61	1.86	4.87	5.14	400	11.73
1	1		17	2	1.521	1.283	4	1.95144	6	2	4	0.666667	55.7895	0005592568	2	71	1	1	0	0	1	3.65	0.83	2.6	10.73	7.44	207	5.65
1	2		31	3	1.078	0.737	1	0.198622	16	14	2	0.125	367.489	0002293486	1	57	0	1	0	0	1.15	3.94	0.98	2.73	8.61	6.13	170	8.63
1	2	1	41	4	2.314	0.648	4	1.49947	11	7	4	0.363636	266.713	0003996123	2	79	1	0	1	0	0.73	4.2	1.21	3.03	6.55	5.37	293	5.05
1	2	0	26	3	1.105	0.89	4	0.98345	7	5	2	0.285714	607.796	0002557433	2	61	1	0	1	1	0.95	5.78	1.02	4.24	5.47	6.23	292	7.48
1	2	0	19	3	0.535	0.22	3	0.088275	6	4	2	0.333333	76.3045	0004260003	2	53	1	1	1	1	0.87	2.81	1.08	1.64	10.15	4.07	249	7.14
1	2	0	41	2	0.735	0.467	1	0.0858113	3	3	0	0	3583.58	0005632630	2	58	0	0	1	0	2.41	6.21	1.03	4.48	5.55	5.28	319	12.28
1	2	21	43	4	1.253	0.697	2	0.43667	1	1	0	0	556.523	0001546427	2	56	1	0	0	1	1.04	3.4	1.16	1.52	5.16			5.16
1	2		14	3	1.277	0.941	1	0.300414	4	4	0	0	266.026	0005670569	1	59	1	1	0	0	2.15	6.15	4.14	5.32	15.38	3.66	404	6.63
1	2		25	3	1.217	0.658	2	0.400393	5	5	0	0	161.527	0002735840	2	73	0	0	1	1	1.2	3.38	1.08	1.9	4.99	5.38	367	6.46
1	1		10	1	1.73	0.735	1	0.317887	4	5	-1	-0.25	56.121	0001902268	1	56	0	1	0	0	4.78	9.62	1.81	6.02	13.8	5.37	241	6.41
0	1		7	0	1.126	0.606	1	0.170589	5	5	0	0	79.8869	0005069922	1	64	0	0	1	0	0.88	5.03	1.71	2.81	5.21	4.67	216	7.44
1	2		21	2	1.286	0.789	3	0.760991	6	6	0	0	538.919	0001798159	2	54	1	0	1	1	1.08	3.93	1.36	2.29	3.74	5.5	300	6.63
0	1		11	1	0.823	0.625	1	0.128594	2	2	0	0	530.777	0003372566	1	48	0	0	0	0	1.53	4.32	1.11	2.55	4.31	4.58	222	8.52
0	1		18	1	2.354	1.562	4	3.67695	2	2	0	0	407.987	0004366221	2	50	0	0	1	1	2.8	3.73	0.7	2.23	4.4	4.38	297	6.74
0	1		15	1	2.041	1.118	2	1.14092	5	4	1	0.2	575.808	0005715964	1	62	1	0	0	0	5.05	5.39	0.81	3.26	5.47	5.26	264	6.32
1	1	有	8	2	1.979	0.921	3	1.36699	2	2	0	0	92.87	0005713978	1	57	1	0	0	0	2.15	4.95	1.37	2.83	5.12	4.1	293	5.41
1	1		26	2	2.455	1.217	3	2.2408	7	7	0	0	1759.12	0005719661	2	56	1	0	1	1	0.92	5.25	1.57	3.29	5.77	5.07	281	4.99
1	2	5	20	4	0.774	0.527	1	0.101975	3	3	0	0	283.217	0005725804	2	64	1	0	0	0	0.94	4.98	1.22	3.35	4.43	2.83	296	5.92
0	1		15	0	0.812	0.677	2	0.274862	5	5	0	0	258.79	0001078837	1	66	0	1	0	0	1.47	5.41	1.17	3.17	10.63	3.48	216	4.43
1	1		10	1	0.996	0.891	2	0.443718	8	7	1	0.125	193.801	0005778763	2	50	1	1	0	0	2.12	4.23	1.02	2.75	9.11	5.44	226	7.58
1	3	有	55	4	1.742	0.959	2	0.835289	6	6	0	0	471.811	0004102890	2	64	1	0	1	0	2.67	4.45	0.79	2.45	4.54	5.8	182	7.27
0	1	4	12	2	1.061	0.606	1	0.160741	2	1	1	0.5	90.7096	0005784959	2	76	0	0	0	1	1.2	4.08	1.08	2.45	5.13			5.69
0	1		8	0				0	5	5	0	0	249.934	0005786080	1	82	1	0	0	0	2.1	5.58	1.18	3.68				5.02
1	2		5	2	1.581	1.045	2	0.826072	8	8	0	0	68.4441	0005799766	1	84	0	0	1	0								4.77
1	1		20	2	0.759	0.432	1	0.081972	0	0	0	#DIV/0!	124.558	0005798550	2	54	1	0	1	0	1.21	5.8	1.36	3.76	4.14	5.61	365	5.27
0	1	0	13	1	1.444	1.009	4	1.457	1	0	1	1	364.856	0005814001	2	52	0	0	1	1	1.69	3.62	1.12	2.15	4.65	3.89	341	5.98
1	1	0	24	3	0.52	0.298	2	0.07748	1	0	1	1	77.1931	0002151333	1	67	1	1	0	0	0.86	4.34	1.47	2.5	7.05	4.32	155	7.06
1	2	0	5	2	1.13	0.461	1	0.130233	3	3	0	0	185.293	0005246653	1	61	1	0	0	0	0.73	3.77	2.2	1.42	4.37	3.93	227	3.18
0	1	0	8	0	0.971	0.959	1	0.232797	7	7	0	0	2.6278	0001230263	1	39	0	1	0	0	3.31	5.04	1.11	3.37	9.64	3.8	281	6.73
1	1	0	7	1	0.54	0.604	2	0.16308	4	3	1	0.25	272.361	0002860061	2	72	1	1	1	1	1.76	6.04	1.23	4.28	6.86	4.17	353	6.33
1	1	0	37	2	1.191	0.617	2	0.367424	3	2	1	0.333333	69.198	0005869691	2	78	1	0	1	1	0.85	3.86	0.82	2.26	4.97			5.91
1	2	6	24	4	0.574	0.407	1	0.0584045	7	7	0	0	213.862	0001312574	1	70	1	1	0	0	0.89	3.53	0.98	2.2	7.82	4.62	179	8.02
1	2	有（4）？	19	4	0.801	0.515	1	0.103129	5	5	0	0	41.1574	0001232351	1	54	1	1	0	0	2.73	4.1	0.99	2.46	7.76	5.92	266	4.73
1	1		8	1	1.944	0.781	1	0.379566	1	1	0	0	94.1903	1037741	2	65	0	1	1	1	1.1	2.48	0.9	1.31	3.92	3.22	312	6.52
1	1		6	1	1.019	0.56	1	0.14266	0	0	0	#DIV/0!	134.936	5893256	2	58	0	0	1	0	1.03	2.95	1.08	1.63	4.58	5.95	268	7.48
0	0		6	0	1.162	0.721	2	0.418901	5	3	2	0.4	199.312	5911481	2	56	1	0	1	1	1.06	4.88	1.29	3.38	5.53	4.71	176	8.08
1	3		43	3	0.653	0.349	2	0.113948	1	0	1	1	2369.33	2835769	2	67	1	0	1	1	0.87	2.5	1.41	0.87	7.17	7.83	260	5.24
0	2		9	1	2.499	1.087	3	2.03731	6	5	1	0.166667	208.642	5923291	2	84	0	0	1	0	1.1	4.93	1.12	3.69	5.45	2.94	290	5.81
0	1		10	0	0.909	0.822	3	0.560399	1	1	0	0	54.1406	5918313	2	62	1	0	0	0	1.38	4.79	1.12	3.4	6.67	3.9	246	8.83
1	2		25	3	1.709	0.894	3	1.14588	3	3	0	0	407.996	5890827	2	89	1	1	1	1	1.08	3.15	0.89	2.15	11.95	5.7	188	9.19
1	1		3	1	1.057	0.595	1	0.157229	2	1	1	0.5	190.354	5925683	2	41	0	0	1	0	0.61	2.59	1.07	1.39	3.99	4.39	211	8.22
0	1		7	0	1.053	0.375	1	0.0987187	0	0	0	#DIV/0!	144.803	4699427	2	62	1	0	1	1	1.57	5.14	1.15	3.56	5.65	4.29	384	8.68
1	1		20	2	0.962	0.857	2	0.412217	1	1	0	0	377.813	5842681	1	53	1	0	0	0	1.9	4.34	1.04	2.75	4.67	3.28	267	9.24
0	1		5	0	0.83	0.418	1	0.086735	1	0	1	1	53.1367	5942523	2	33	0	0	1	0	1.37	4.3	0.84	3.06	5.32	3.82	565	6.09
0	1		16	1	0.923	0.527	2	0.243211	1	1	0	0	61.0467	5943431	2	63	0	1	1	1	1.48	4.59	1.09	2.99	10.08	3.94	194	5.05
1	1		10	1	1.685	0.69	1	0.290662	6	5	1	0.166667	204.925	5945980	2	65	0	1	1	1	1.56	4.26	1.15	2.56	9.84	3.44	231	5.52
1	1	2	18	3	1.713	0.731	1	0.313051	2	2	0	0	189.942	1633203	2	69	0	1	0	0	1.12	3.16	1.03	1.83	5.99	5.62	238	5.6
1	1		20	2	1.136	0.498	1	0.141432	1	1	0	0	28.1742	4170101	2	57	1	0	1	0	1.99	3.82	0.93	2.48	4.1	3.79	183	10.97
1	2		13	3	1.319	0.953	4	1.25701	3	2	1	0.333333	483.467	2154401	1	68	0	0	0	0	2.55	5	1.14	3.2	5.41	3.75	305	5.61
1	1		4	1	1.546	0.83	2	0.64159	1	1	0	0	141.161	5951617	1	61	1	1	0	0	1.91	4.07	1.17	2.49	7.92	6.27	243	6.62
1	1		5	1	1.604	0.956	2	0.766712	1	1	0	0	115.756	5961097	1	60	1	0	0	0	1.39	5.02	1.23	3.13	4.61	5.19	340	7.37
1	1	2	14	3	0.718	0.666	2	0.239094	1	0	1	1	113.105	5969824	2	56	0	0	0	0	0.92	4.59	1.22	3.23	4.37	6.5	238	7.01
0	2		5	1	1.184	0.954	4	1.12954	2	1	1	0.5	390.163	4884034	1	56	0	0	0	0	3.07	5.53	1.07	3.65	4.97	4.24	326	7.53
1	2		25	3	1.634	0.615	3	0.753683	1	0	1	1	689.876	5978217	1	48	1	1	0	0	1.15	3.97	1.36	2.32	5.7	4.36	303	5.56
1	2		15	3	2.065	1.034	2	1.0676	8	7	1	0.125	340.845	5980905	2	70	0	0	1	0	0.59	2.97	1.12	1.67	3.92			5.62
1	2		21	3	0.574	0.501	1	0.0718935	1	1	0	0	544.275	5293246	2	65	0	0	1	1	0.9	3.13	1.13	1.77	3.94	2.74	399	6.93
1	2		56	3	1.352	0.686	1	0.231868	6	5	1	0.166667	254.389	1412881	1	77	0	0	0	0	0.59	4.9	1.67	2.68	4.05	6.31	146	4.42
1	2	4	45	4	1.447	0.888	3	0.963702	5	3	2	0.4	431.313	3919647	2	54	1	1	1	0	1.56	4.45	1.1	2.72	9.28	8.11	298	10
1	2		60	3	0.392	0.262	1	0.025676	3	2	1	0.333333	108.65	4935247	2	94	0	0	1	0	0.77	4.25	1.49	2.47	5.17	7.06	342	5.25
1	2	7	32	4	1.953	1.185	3	1.73573	7	5	2	0.285714	458.79	5987658	2	83	1	0	0	0	0.57	5.14	1.44	3.17	5.29	6.91	321	21.14
1	1		28	2	0.848	0.375	2	0.159	1	1	0	0	720.44	5990142	2	51	0	0	1	0	0.58	2.84	1.26	1.46	3.3	2.91	369	8.88
1	1		38	2	1.814	1.327	1	0.601795	7	5	2	0.285714	248.127	3919917	2	67	1	0	1	1	1.11	4.75	1.1	3.1	7.04	4.4	277	5.3
1	1		8	1	1.17	1.138	2	0.66573	2	2	0	0	193.112	5998187	1	51	0	0	0	0	1.66	5.13	1.11	3.26	5.27	5.07	335	5.79
1	1	1	8	1	0.558	0.516	2	0.143964	3	2	1	0.333333	273.654	4419818	1	52	0	0	0	0								5.47
1	3		49	3	1.289	0.363	2	0.233953	3	1	2	0.666667	1195.62	2258843	2	68	0	1	1	1	6.11	5.16	0.88	2.24	8.21	6.36	347	10.64
0	1	1	36	2	1.1421	0.473	2	0.270107	3	2	1	0.333333	787.648	6016228	2	42	0	0	1	0	2.52	3.94	1.05	2.3	4.44	3.06	552	7.39
1	1		3	1	1.381	0.494	1	0.170553	3	0	3	1	347.014	4303306	2	50	1	0	0	0	1.7	3.7	0.97	2.22	3.86	3.67	276	12.61
0	1		10	0	1.238	0.726	1	0.224697	4	4	0	0	107.183	6011614	1	51	1	1	0	0	1.54	3.04	1.22	1.54	8.88	3.17	272	5.96
1	1		18	2	1.562	0.954	1	0.372537	1	0	1	1	316.25	1791014	2	69	1	1	1	0	1.1	4.16	1.37	2.62	6.34	4.56	221	5.66
1	1	3	4	2	0.971	0.75	1	0.182062	0	0	0	#DIV/0!	113.208	5950012	2	38	1	0	0	0	1.43	4.33	1.17	2.69	4.63	5.07	344	8.63
1	1		20	2	0.757	0.559	1	0.105791	2	2	0	0	211.18	4709450	2	55	1	0	0	0	1.78	5.55	1.38	4.01	5.84	4.01	455	6.23
1	1		41	2	1.417	0.795	4	1.12652	8	6	2	0.25	304.821	6037266	2	88	0	0	0	1	0.81	4.28	1.86	2.06	5.46	8.46	239	4.85
1	2		18	3	1.423	0.363	2	0.258275	10	1	9	0.9	1546.86	492009	2	56	1	0	1	1	0.9	4.5	1.52	2.72	5.84	8.61	401	9.63
1	1		4	1	1.194	1.118	3	1.00117	4	2	2	0.5	56.7021	6033439	2	48	1	0	0	0	1.46	3.84	0.9	2.79	5.56	4.26	400	4.62
1	1		17	2	0.822	0.648	2	0.266328	0	0	0	#DIV/0!	166.901	6029205	2	59	0	0	1	1	0.79	2.95	0.91	1.79	4.65	4.81	320	8.55
1	2	24	12	4	0.4	0.363	1	0.0363	0	0	0	#DIV/0!	104.453	909988	2	53	1	0	1	1	0.72	3.21	1.16	1.95	4.9	4.52	390	7.5
0	1		12	1	1.124	0.471	2	0.264702	0	0	0	#DIV/0!	3575.09	6040534	2	56	0	0	1	1	2.5	6.38	1.64	4.34	5.12	4.61	381	6.96
1	2		11	3	1.15	0.834	3	0.719325	6	3	3	0.5	722.88	6044066	1	51	1	0	0	0	1.37	4.81	1.2	3.2	5.1	5.99	411	4.25
1	3	21	38	4	0.687	0.439	1	0.0753982	1	0	1	1	3199.89	2592882	2	61	1	1	1	0	0.49	2.34	1.3	0.9	4.44	4.68	392	6.69
1	1	0	19	2	0.682	0.352	1	0.060016	1	1	0	0	231.295	502922	1	56	1	1	0	0	1.4	3.89	0.92	2.74	12.48	4.19	209	4.93
1	2		20	3	1.614	0.89	1	0.359115	0	0	0	#DIV/0!	335.743	6048327	2	77	0	0	0	0	0.97	4.64	1.15	3.15	5.27	4.75	260	8.31
1	2		22	3	1.269	0.696	2	0.441612	0	0	0	#DIV/0!	1073.28	6052555	1	68	0	0	0	0	1.25	4.65	1.55	3.03	4.51	6.3	414	6.97
1	3	22	23	3	1.352	0.722	1	0.244036	2	1	1	0.5	604.484	3899671	2	51	1	0	1	1	1.07	3.85	1.11	2.62	4.68	7.37	220	6.4
0	1		8	1	0.694	0.283	1	0.0491005	0	0	0	#DIV/0!	111.552	4589054	2	68	1	0	0	0	0.9	4.24	1	3.1	4.63	7.23	416	6.6
1	1		8	1	0.638	0.447	2	0.142593	2	2	0	0	258.272	6056717	2	77	0	0		1	2.69	4.89	1.06	3.34	4.94	4.65	392	4.69
0	1		5	0	0.936	0.618	1	0.144612	3	2	1	0.333333	308.204	5511601	1	49	0	0	0	0	1.25	4.14	1.12	2.48	3.98	4.03	299	5.06
1	3	左侧丘脑、脑桥、右侧小脑多发异常信号，考虑顺磁性物质沉积(15?)	41	4	0.742	0.324	1	0.060102	2	2	0	0	614.468	2394573	2	83	1	0	1	1	0.59	3.7	0.93	2.44	5.92	3.4	348	6.96
1	2		21	3	1.551	0.585	3	0.680501	4	2	2	0.5	633.673	6068874	1	69	0	0	0	0	2.07	5.19	1.47	2.72	4.34	4.95	295	4.16
0	2	0	28	2	1.367	1.232	2	0.842072	4	4	0	0	998.025	6076242	1	62	0	0	0	0	0.86	3.98	1.1	2.77	3.95	4.89	218	4.96
1	1	0	30	2	1.872	0.789	2	0.738504	7	5	2	0.285714	112.025	6070579	2	68	1	0	1	1	1.66	3.76	1.15	2.15	6.31	3.62	382	7.32
1	2		13	3	2.338	0.781	3	1.36948	10	6	4	0.4	327.846	6077283	2	53	1	1	0	1	1.72	5.04	1.21	3.19	14.67	5.61	376	8.37
1	2	4	46	4	0.603	0.603	2	0.181804	0	0	0	#DIV/0!	105.163	6070564	2	78	1	0	0	0	1.09	3.56	1.28	1.97	5.51	5.67	206	6.4
1	1	0	15	2	1.071	0.429	2	0.229729	0	0	0	#DIV/0!	153.438	6088697	1	54	1	1	0	0	3.28	6.55	1.43	4.22	18.43	5.54	256	6.02
1	1	0	27	2	1.103	0.857	2	0.472635	4	4	0	0	868.344	3852938	2	60	0	0	1	0	1.13	4.64	1.33	2.93	4.88	5.45	347	5.86
1	1		2	1	0.541	0.427	1	0.0577518	1	0	1	1	121.254	6059815	2	65	0	0	0	0	0.91	4.77	1.23	3.43	4.4	5.97	363	7.18
1	1		6	1	1.228	0.813	2	0.499182	4	4	0	0	467.625	3963067	1	63	0	0	0	0	1.03	4.68	1.59	2.86	5.23	6.45	309	3.71
1	3		8	2	0.959	0.585	2	0.280507	4	3	1	0.25	222.508	4285972	1	69	1	1	0	0	1.21	6.3	1.38	4.75	6.31	6.42	234	6.56
1	3		45	3	0.833	0.622	2	0.259063	1	1	0	0	2841.73	1976406	2	69	1	0	0	1	0.79	3.15	1.52	1.61	4.38	4.22	285	4.84
1	2		28	3	0.167	1.057	2	0.0882595	4	4	0	0	511.857	6103094	2	60	0	0	0	0	0.79	3.56	1.24	2.07	5.39	5.57	376	6.91
1	1		6	1	0.447	0.369	1	0.0412358	4	4	0	0	194.949	1348048	2	61	0	1	0	0	0.51	2.6	1.06	1.46	4.48	3.53	255	4.91
0	1		4	0	1.559	1.032	1	0.402222	0	0	0	#DIV/0!	265.845	2983397	1	55	1	0	0	0	3.48	4.08	0.97	2.32	4.1	5.52	262	5.24
1	2		23	2	1.692	0.875	4	1.4805	1	0	1	1	1626.89	6109096	2	61	1	0	0	1	0.82	4.19	1.43	2.53	4.47	4.23	227	3.33
0	2		20	2	2.051	1.381	5	3.54054	2	2	0	0	444.248	6125977	1	62	0	0	0	0	0.75	6.22	2.15	3.78	5.77
0	1		3	0	0.411	0.39	2	0.080145	1	0	1	1	209.996	4283711	1	44	0	0	0	0	0.75	4.75	2.18	2.25	4.1	3.15	320	3.87
0	1		8	0	1.206	1.035	1	0.312052	6	5	1	0.166667	151.595	6129136	2	57	1	1	0	0	1.53	4.83	1.14	3.25	8.56	4.41	283	5.89
1	2	21	20	4	0.498	0.417	1	0.0519165	0	0	0	#DIV/0!	349.381	2042439	1	44	0	0	0	0	1.44	5.04	1.33	3.07	4.47	5.16	316	5.12
1	1		15	2	0.546	0.367	1	0.0500955	3	3	0	0	211.653	5964074	1	66	1	1	1	0	3.66	5.62	1.1	3.57	13.13	6.01	374	5.27
1	3	2	30	4	1.245	0.58	1	0.180525	2	2	0	0	2171.55	1368716	1	74	1	1	0	0	4.3	5.24	0.88	3.08	10.9	4.43	351	4.47
1	2		15	3	0.503	0.25	2	0.062875	0	0	0	#DIV/0!	674.058	3183162	1	55	0	0	0	0	1.73	3.16	0.83	1.67	4.56	6.01	339.5	5.64
1	1		18	2	0.699	0.467	2	0.163216	1	1	0	0	266.026	599878	2	82	1	0	0	0	0.81	3.12	1.24	1.53	4.17	5.61	300.7	9.04
1	2		26	3	1.135	0.471	4	0.534585	3	0	3	1	1335.48	2497934	2	60	1	0	0	0	2.72	3.97	1.19	2.13	5.92	3.54	377.4	9.16
0	1	1	14	1	0.868	0.447	2	0.193998	1	1	0	0	227.272	6157869	1	70	0	0	0	0	1.67	4.27	1.34	2.65	4.86	3.67	213	4.95
1	1		3	1	0.954	626	4	597.204	0	0	0	#DIV/0!	218.042	5541537	1	46	1	0	0	0	2.71	7.46	1	5.61	9.29	4.7	364	8.44
1	3		55	3	1.646	0.543	2	0.446889	3	2	1	0.333333	5724.07	6172344	2	55	0	0	0	0	1.24	4.62	1.37	2.85	4.99	5.67	434.8	5.81
1	1	0	11	2	0.53	0.383	1	0.0507475	3	3	0	0	296.057	3282409	1	54	0	0	0	0	2.59	6.23	1.49	3.69	7.23
1	1		10	1	0.784	0.485	1	0.09506	2	2	0	0	217.332	6056717	2	77	0	0	1	1	1.94	3.4	0.88	2.05	4.8	3.67	361.5	3.88
1	1		8	1	0.834	0.576	1	0.120096	0	0	0	#DIV/0!	203.134	3099726	1	60	0	1	0	0	1.04	4.22	1.56	2.21	7.17	4.67	260	6.56
1	1		16	2	1.154	0.834	4	0.962436	0	0	0	#DIV/0!	224.882	6186728	2	46	1	1	1	1	1.85	3.92	1.19	2.33	14.91	5.04	263.1	9.67
0	3	7	38	4	1.04	0.502	2	0.26104	1	1	0	0	2482.4	0005126710	1	64	1	0	0	0	2.52	5.15	1.24	3.33	4.95	5.46	349.9	4.69
1	2	9	62	4	1.392	0.486	2	0.338256	0	0	0	#DIV/0!	413.038	0004825766	1	79	1	0	0	0	0.7	3.32	1.15	2.04	5.35	3.91	251	5.99
1	2	6	31	4	0.868	0.372	1	0.080724	2	2	0	0	112.787	0006081792	1	77	1	1	0	0	1.04	2.89	1.14	1.54	8.48	4.88	212.7	4.19
1	3	0	15	3	0.828	0.585	1	0.121095	0	0	0	#DIV/0!	162.431	0006228091	2	71	1	0	0	0	1.24	4.81	1.82	2.71	4.73	6.21	306.7	4.98
0	1	0	4	0	1.095	1.049	2	0.574327	4	3	1	0.25	113.445	0000430561	1	48	1	1	0	0	2.12	5.66	1.16	3.88	11.87	3.98	309.6	9.72
1	2	2	27	4	0.606	0.593	1	0.0898395	2	1	1	0.5	664.953	0000428123	2	83	1	0	1	1	0.97	4.38	1.1	2.94	4.92	5.74	370.4	7.2
1	3	0	23	3	0.998	0.533	2	0.265967	1	0	1	1	312.962	0004421235	1	67	1	0	0	0	2.54	5.75	1.61	3.45	5.42	4.1	310.3	4.66
0	1	0	8	0	0.691	0.665	1	0.114879	0	0	0	#DIV/0!	374.228	0001525542	2	47	0	0	0	0	5.03	4.31	0.79	2.21	4.76	4.43	476.4	5.54
1	1	1	16	3	2.466	0.893	3	1.6516	6	6	0	0	58.7801	0006260374	2	60	1	0	0	0	2.24	5.83	1.04	3.67	4.89	5.72	477.8	5.96
0	1	0	3	0	1.632	0.967	1	0.394536	7	7	0	0	221.355	0006262191	1	76	1	0	0	0	1.19	5.45	1.25	3.61	5.08	4.98	295.1	5.51
1	2	15	15	4	1.093	0.903	1	0.246745	3	0	3	1	101.176	0006262462	1	79	1	0	0	0	1.9	5.18	1.23	3.26	4.29	3.16	392.4	6.42
1	2		20	3	0.921	0.658	2	0.303009	4	4	0	0	394.018	0006287930	1	82	1	0	0	0	0.93	4.39	1.13	2.96	4.72	4.89	281	7.46
1	2		12	3	0.69	0.368	1	0.06348	1	0	1	1	201.87	0004830982	2	79	1	1	0	0	1.88	4.83	1.16	3	9.69	5.36	310.8	6.15
0	1	1	6	1	1.416	1.073	2	0.759684	0	0	0	#DIV/0!	180.179	0006298866	2	48	1	1	1	1	0.83	3.88	1.13	2	5.47	6.98	289.8	6.67
1	1	0	5	1	1.839	0.615	2	0.565492	2	1	1	0.5	198.657	0002728852	1	53	1	0	0	0	1.74	5.12	1.02	3.22	5.45	5.13	231.9	5.2
1	2	1	32	4	1.108	0.512	3	0.425472	5	4	1	0.2	514.37	0004848269	2	66	1	0	0	1	1.34	5.49	1.73	2.97	5.77	2.92	238.4	4.86
1	3	44	15	4	0.739	0.301	1	0.0556097	4	0	4	1	2564.14	0003555325	2	70	1	0	1	1	1.36	2.87	0.64	1.93	3.28	10.56	360	25.16
0	2	0	16	2	1.006	0.542	1	0.136313	3	1	2	0.666667	118.178	0006304715	1	56	1	1	0	0	2.59	3.53	0.89	2.25	12.3	5.67	220.9	6.44
1	2	2	21	4	1.678	1.228	2	1.03029	4	4	0	0	506.04	0005834349	1	52	1	0	0	0	1.41	3.84	1.01	2.63	4.66	4.67	307.1	6.9
0	1		9	0	1.162	0.962	2	0.558922	6	5	1	0.166667	178.144	0006330072	2	68	0	0	1	1	0.96	4.72	1.92	2.29	5.19	5.6	392.9	4.04
0	1	0	12	1	1.427	0.742	3	0.794126	5	4	1	0.2	215.22	0006333074	1	67	1	1	0	0	2.34	4.37	1.36	2.33	11.25	7.1	219	5.31
1	3	14	15	4	0.888	0.418	2	0.185592	4	4	0	0	215.439	0005059141	1	53	1	0	0	0	1.51	5.76	1.01	4.07	9.25	4.27	251.6	5.52
1	2	0	8	2	1.059	0.903	2	0.478138	4	4	0	0	227.981	0006337798	2	51	1	1	1	1	1.16	3.64	1.17	1.99	6.29	10.31	386.7	12.1
1	1	4	30	3	0.498	0.362	1	0.045069	0	0	0	#DIV/0!	157.225	0002552201	2	65	1	0	1	1	0.95	4.72	1.44	2.79	4.18	2.98	253.6	5.88
0	2	0	11	1	1.826	0.763	2	0.696619	3	2	1	0.333333	2252.69	0000046712	1	63	1	1	0	0	1.31	4.39	4.53	2.48	7.75	5.99	253.5	6.33
0	1	0	14	0	1.382	1.021	4	1.41102	0	0	0	#DIV/0!	902.762	0004369779	2	41	1	0	1	0	1.45	4.3	1.27	2.56	4.22	4.23	321.8	4.08
1	1		8	1	1.105	0.457	2	0.252493	1	1	0	0	230.348	0006359157	2	47	0	0	1	0	3.26	5.83	1.18	3.59	6.28	5.91	450.9	7.34
0	1	0	7	0	1.195	0.817	2	0.488158	3	3	0	0	47.1844	0006358058	2	49	0	0	1	0	1.32	4.23	1.37	2.49	3.72	4.3	400.8	7.58
0	1		11	1	1.303	0.582	1	0.189586	6	11	-5	-0.833333	310.453	0004953658	2	74	1	0	1	0	0.72	3.05	1	1.89	4.87	3.65	232.1	7.99
0	2		18	2	0.62	0.41	1	0.06355	2	2	0	0	3266.51	0006270606	2	53	1	0	0	1	1.89	4.2	1.13	2.26	12.48	4.16	358	6.2
1	1	22	18	3	1.893	1.136	3	1.61284	2	2	0	0	63.513	0006364068	2	46	1	0	1	1	2.24	4.73	0.83	3.35	4.15	2.77	384	6.2
0	1	0	6	0	2.227	0.959	4	2.13569	1	0	1	1	96.7258	0003042184	2	60	0	0	0	0	1.6	3.79	1.01	2.13	3.96	5.73	309.5	7.63
1	2	0	7	2	0.592	0.407	3	0.180708	1	1	0	0	178.523	0006370092	1	80	0	0	0	0	0.85	4.06	1.36	2.22	4.42	4.22	254.2	5.91
0	2		12	2	1.35	0.671	2	0.452925	6	6	0	0	279.606	0003422408	2	75	1	0	0	0	2.09	3.62	1.01	2.11	11.9	2.61	265.5	5.08
0	1		12	1	0.906	0.724	1	0.163986	0	0	0	#DIV/0!	187.752	0005688979	2	57	1	0	1	1	0.62	3.98	1.35	2.58	4.64	6.23	255.3	5.88
1	2		25	3	1.139	0.746	2	0.424847	1	1	0	0	235.31	0001971417	2	75	0	0	1	0	2.12	4.46	0.96	2.97	4.47	6.21	398.3	4.51
1	2	0	20	3	1.483	1.228	3	1.36584	10	9	1	0.1	164.087	0006381849	2	76	0	0	0	0
1	1	3	43	3	1.335	0.962	1	0.321068	5	4	1	0.2	107.056	0001755268	2	66	0	0	0	0
1	2		9	2	0.987	0.931	3	0.689173	4	4	0	0	289.576	0006107535	2	82	1	0	1	0	1.1	4.2	1.09	2.69	4.09	6.61	301.4	5.52
1	2	0	27	3	1.478	0.896	2	0.662144	4	4	0	0	102.323	0004765669	2	84	0	0	1	1	0.67	3.98	1.38	2.36	4.54	2.25	294.8	4.97
0	3	0	12	2	1.248	0.3303	1	0.103054	1	1	0	0	60.6732	0000047502	1	79	0	1	0	0	2.38	5.96	1.23	4.32	9.43	10.1	296.6	7.03
0	2	0	34	2	1.024	0.822	1	0.210432	7	6	1	0.142857	850.683	0002974267	1	61	1	1	0	0	0.88	4.51	1.45	2.63	6.6	4.9	264.5	4.24
0	1	0	9	0	0.46	0.363	1	0.041745	0	0	0	#DIV/0!	137.583	0001032486	1	67	0	0	0	0	1.17	4.77	1.22	3.02	4.21	4.64	256.8	5.88
1	1	0	10	1	2.343	1.319	4	3.09042	11	11	0	0	194.851	0003198729	2	50	1	1	0	0	1.65	8.01	1.46	5.99	11.99	4.62	207.4	6.13
0	1	0	4	0	1.631	1.433	2	1.16861	2	1	1	0.5	696.889	0005373329	1	79	0	1	0	0	1.46	3.26	0.97	1.82	8.02	4.06	257.1	6
0	1	0	3	0	1.186	0.895	3	0.796102	1	1	0	0	299.685	6693516	2	49	0	0	1	0	1.46	3.98	1	2.77	4.4	4.57	359.9	6.94
0	0	0	3	0	1.315	1.049	2	0.689717	1	0	1	1	177.813	6297729	1	64	0	0	0	0	1.21	3.63	1.14	2.16	5.04	3.32	186.4	7.1
1	2	4	18	3	0.604	0.372	1	0.056172	2	0	2	1	337.312	5794786	1	69	1	1	0	0	2.25	3.92	1.01	2.58	3.09	8.18	393.6	8.49
0	1	0	7	0	0.728	0.56	1	0.10192	2	2	0	0	200.057	6698426	2	59	1	0	1	1	1.6	4.84	1.08	3.4	4.23	9.76	348.1	9.06
0	1	0	6	0	0.994	0.349	1	0.0867265	0	0	0	#DIV/0!	783.151	6581271	2	57	0	0	1	1	1.37	4.98	2.04	2.35	4.62	15.32	325.5	8.91
1	1	0	12	2	1.108	0.836	1	0.231572	1	1	0	0	345.594	6702349	2	47	1	0	1	1	0.86	4.41	1.29	2.62	3.9	15.55	317.7	7.48
0	2		4	1	1.197	0.907	2	0.54284	2	2	0	0	241.47	1526186	1	63	1	0	0	0	1.25	4.05	1.5	2.19	5.02	25.05	200.7	5.39
0	1	0	7	0	1.085	0.547	1	0.148374	2	1	1	0.5	311.044	6710683	2	45	1	1	1	1	1.4	3.01	1.02	1.6	6.17	12.79	322.5	6.45
1	3		21	2	1.115	0.303	2	0.168923	0	0	0	#DIV/0!	588.629	5456785	2	69	1	0	0	0	0.65	3.96	1.43	2.1	4.4	11.51	356.9	4.07
0	1		6	0	1.118	0.723	1	0.202079	2	0	2	1	715.234	6714713	1	55	0	0	0	0	0.82	4.91	1.67	2.86	3.95	11.03	241.7	3.19
0	1	0	7	0	1.6	1.07	1	0.428	6	6	0	0	818.175	3246699	1	68	1	0	0	0	1.9	4.41	0.84	2.95	5.44	9.68	505.2	7.27
0	1		15	1	0.855	0.756	2	0.32319	1	1	0	0	366.419	6676313	2	72	1	0	1	1	0.67	2.95	1.04	1.64	5.08	11.02	358.4	5.93
0	2		16	1	1.884	0.921	5	2.16895	2	0	2	1	4366.67	6723927	2	75	0	0	1	1	0.71	3.43	1.51	1.6	4.95	21.01	191.9	10.02
1	2		25	3	0.499	0.363	2	0.0905685	11	11	0	0	29.8431	6734973	1	54	0	1	0	0	0.79	3.92	1.42	2.32	15.89	21.35	192.2	4.11
1	1		6	1	1.021	0.606	2	0.309363	3	2	1	0.333333	108.432	6733700	2	47	0	0	1	1	1.33	5.29	1.35	3.47	5	14.41	452.2	6.9
0	1	0	11	1	0.721	0.489	1	0.0881422	5	5	0	0	261.348	6739548	1	54	0	1	0	0	1.08	5.54	1.54	3.48	9.16

## Sheet: healthy control1
FAM19A5
	sex	age	hypertension	diabetes
					smoking	drinking	P	BP（mmHg）	TG （0.3-1.92）mmol/L	TC （2.32-5.62）mmol/L	HDL （0.8-1.8）mmol/L	LDL （1.9-3.12）mmol/L	Cr （31-132） umol/L	Glu （3.9-6.16）mmol/L	UA	WBC （4-10） ×109/L	PLT （125-350） ×109/L
152.811	1	58	1	0	0	0	75	140/79	1.33	3.88	1.72	1.46	79	4.7	318	7.42	343
190.225	2	59	1	0	0	1	81	171/88	0.46	3.53	1.62	1.9	72	4.53	254	8.17	221
1084.72	2	55	0	0	0	0	76	125/77	2.02	6.12	1.15	4.54	88	4.26	348	8.56	315
158.088	1	80	1	1	0	0	79	181/88	1.5	5.99	1.38	4.09	87	4.28	294	4.19	177
1326.09	1	49	0	1	0	0	68	121/79	2.1	4.6	1.53	2.8	58	7.46	279	4.54	181
611.646	2	63	0	1	1	0	60	119/66	1.24	4.71	1.03	3.23	91	9.27	359	7.65	147
230.592	1	56	0	0	0	0	74	145/87	2.52	5.49	0.93	3.64	87	6.03	378	5.02	233
1187.38	2	59	1	0	1	0	64	123/73	1.68	5.72	1.37	3.1	97	4.95	334	7.39	209
206.978	1	39	0	0	0	0	71	102/55	0.34	2.97	1.72	1.23	83	4.54	203	3.72	147
406.116	2	47	0	0	0	0	69	124/70	5.01	5.5	1.08	2.66	85	6.56	347	5.08	219
296.09	1	77	1	0	0	0	71	135/74	1.05	5.88	1.34	3.9	85	5.04	274	3.72	134
161.167	2	59	0	0	1	0	69	154/98	1.41	3.95	1.04	2.6	102	4.48	287	6.23	144
201.805	1	59	1	1	0	0	74	200/103	3.51	4.29	1.13	2.21	72	9.43	220	6.79	363
140.065	2	51	0	0	1	0	74	124/72	1.62	5.22	1.65	2.9	101	6.69	428	8	181
988.974	1	83	1	0	0	0	69	150/67	1.06	5.59	1.73	3.54	107	7.41	593	6.53	218
280.578	1	55	0	0	0	0	72	133/77	0.96	5.06	1.42	2.91	89	4.7	349	3.87	202
739.11	1	82	1	0	0	0	70	149/71	0.99	4.56	1.49	2.72	67	4.77	226	3.43	163
32.1073	2	58	0	0	0	0	52	162/89	1.03	2.45	1.78	3.01	97	4.85	380	5.25	248
295.425	1	61	1	1	0	0	76	135/82	2.95	4.85	1.4	2.63	68	6.61	203	4.11	276
88.7384	2	29	0	0	0	0	97	134/74	0.63	4.66	1.45	2.91	88	4.31	346	5.91	260
60.0714	2	75	0	0	0	1	60	150/80	1.18	3.02	1.61	1.28	94	5.57	359	5.7	172
717.483	2	57	1	0	0	0	84	127/85	1.24	4	1.57	2.17	90	5.76	270	5.04	183
463.197	1	70	1	0	0	0	48	143/75	1.02	3.65	1.04	2.49	70	5.49	254	4.76	165
136.816	1	87	1	1	0	0	58	133/52	1.83	4.78	1.06	3.05	98	5.15	357	9.08	160
270.913	1	72	0	0	0	0	78	151/77	无	无	无	无	67	8.03	379	6.43	143
2996.07	2	51	1	0	0	0	63	134/76	0.71	2.5	1.22	1.16	94	4.83	293	6.77	231
263.312	2	77	1	0	0	0	70	162/80	0.75	5.09	1.56	3.11	95	4.53	278	4.35	173
38.8757	1	85	0	0	0	0	68	164/76	1.17	5.16	1.24	3.3	97	4.88	285	6.55	231
216.383	1	86	1	0	0	0	71	147/72	1.35	4.25	1.28	2.68	109	5.29	230	6.1	240
32.7622	2	64	0	1	1	1	78	147/80	1.53	6.29	1.19	4.2	85	8.03	340	4.96	167
89.6248	1	68	0	0	0	0	87	155/75	2.41	6.45	1.43	3.88	83	11.62	210	6.79	205
26.4327	2	47	0	0	0	0	78	124/84	1.06	4.09	1.08	2.58	105	5.49	349	5.96	138
22.7233	2	62	0	0	0	0	68	127/66	2.89	5.34	1.53	2.88	88	5.77	350	7.15	206
77.1345	2	61	0	0	0	0	58	135/82	1.03	6.05	2.73	2.48	85	4.96	399	5.49	213
326.713	1	76	0	0	0	0	80	144/105	1.47	5.14	1.45	2.91	73	5.58	311	5.12	173
139.186	1	75	0	0		0	55	115/64	1.04	5.32	1.33	3.18	79	4.68	284	7.42	251
292.765	2	55	1	1	0	1	61	119/62	10.64	6.09	0.96	1.06	71	9.27	211	3.98	198
239.207	2	48	0	0	0	0	76	119/56	0.63	5.68	1.87	3.3	86	4.95	420	9.45	224
1113.82	2	46	1	0	1	1	99	144/105	1.86	4.9	1.71	2.45	84	5.76	289	5.6	177
262.867	1	51	0	0	0	0	47	111/66	0.51	5.54	2.3	2.81	78	4.5	436	4.09	168
105.83	2	53	0	0	0	0	60	115/76	2.47	4.25	1.24	2.36	103	7.42	474	6.35	214
82.3881	2	77	0	1	0	1	74	116/73	6.24	6.33	1.21	2.36	108	6.87	529	6.17	125
913.76	1	56	1	0	0	0	68	156/84	1.09	5.15	2.13	2.57	72	7.01	314	8.23	245
282.868	1	51	0	0	0	0	72	155/75	1.15	5.17	1.7	3.02	77	5.11	190	7.49	255
216.905	2	63	1	1	0	0	78	147/83	2.07	5.11	1.28	3.15	78	8.08	271	4.68	275
456.309	1	63	0	0	0	0	58	109/74	1.64	5.42	1.7	2.97	88	4.93	281	7.95	203
649.646	2	50	0	0	0	0	74	124/84	1.37	4.22	1.33	2.45	83	7.99	387	2.41	115
246.28	2	61	0	1	0	0	80	127/66	2.58	4.79	1.28	2.74	84	7.25	234	5.81	231
86.5484	1	52	0	0	0	0	55	115/64	0.86	4.13	1.46	2.24	66	5.18	373	4.06	200
1827.99	1	61	1	1	0	0	68	126/73	1.55	4.63	1.5	2.57	85	6.48	325	4.3	221
282.505	2	60	0	0	0	0	90	139/82	1.31	5.04	1.67	2.83	83	6.57	415	5.46	151
116.357	2	48	0	0	0	1	76	119/70	1.7	4.57	1.25	2.86	8.9	5.4	255	3.32	133
909.397	1	62	1	1	0	0	62	126/78	1.54	4.44	1.47	2.45	93	4.93	452	6.53	316
181.323	1	49	0	0	0	0	85	129/82	2.53	5.99	1.22	3.85	81	6.11	280	6.72	211
1134.31	1	55	0	0	0	0	68	120/62	0.5	6.34	1.77	4.1	71	5.3	353	5.36	209
61.2089	2	45	0	0	0	1	72	110/82	1.96	5.05	1.11	3.07	117	7.44	334	5.37	198
4653.7	1	64	0	1	0	0	66	163/69	1.99	3.78	1.31	1.9	92	8.11	347	6.88	231
172.532	2	46	0	0	0	0	78	104/68	1.69	5.19	1.24	3.36	93	5.01	368	5.7	226
65.7154	1	73	0	1	0	0	63	126/66	1.44	5.56	1.22	3.79	80	6.78	331	7.16	195
134.579	2	74	1	0	0	0	69	142/89	1.11	4.12	1.53	2.29	101	4.33	344	4.4	196
147.632	1	69	1	0	0	1	56	136/60	1.39	5.27	1.3	3.16	76	4.52	231	3.61	183
198.209	1	50	0	0	0	0	76	126/87	1.31	4.1	1.12	2.78	87	4.63	520	4.87	194
111.373	2	47	1	0	0	1	78	139/92	2.17	4.57	1.32	2.53	89	5.65	552	8.03	235
79.2947	2	41	0	0	0	1	71	143/91	2.37	5.66	1.31	3.35	100	4.84	415	5.98	207
56.7731	2	50	0	0	0	1	68	112/70	1.22	4.02	1.19	2.29	85	4.84	437	6.68	342
277.613	2	50	0	0	0	1	64	137/80	1.57	3.84	0.96	2.24	75	4.53	346	4.88	214
176.657	2	59	0	0	0	1	88	117/68	1.21	5.33	1.31	3.07	105	5.4	405	7.26	193
102.64	2	69	0	0	1	1	78	127/63	1.48	5.74	1.21	3.49	100	5.05	222	6.07	146
72.6114	2	67	1	0	0	1	62	139/77	0.96	4	1.46	1.94	104	6.49		14.7	285
246.863	1	55	1	0	0	0	70	129/75							460	7.61	268
267.474	2	38	1	0	1	0	72	149/99	1.88	5.04	1.39	2.78	103	4.77	143	5.44	164
400.615	1	67	0	0	0	0	78	168/78	1.37	3.98	1.35	2.2	77	5.65	243	4.16	168
73.1556	2	67	0	0	1	1	51	115/68	0.61	4.75	2.01	2.17	67	3.75	293	4.05	194
194.794	2	71	0	1	1	1	70	119/69	1.27	6.31	1.39	4.07	92	5.67	323	4.24	190
204.863	1	55	0	0	0	0	63	126/67	5.98	5.41	1.22	2.15	83	4.79	404	6.61	255
78.2596	2	57	0	0	0	0	78	126/69	1.8	5.84	1.63	3.49	104	4.33	393	7.19	183
268.198	1	57	1	0	0	0	78	176/109	2.83	5.62	1.36	3.21	84	4.94	324	5.88	162
91.2435	2	58	0	0	0	0	78	123/73	1.25	4.23	1.28	2.37	101	5.61	387	7.38	232
119.936	1	70	1	1	0	0	59	180/77	3.64	5.46	1.7	2.43	84	6.48	221	4.78	208
152.018	1	72	0	0	0	0	72	97/60	1.44	4.5	1.82	2.07	73	4.37	358	6.69	303
1342.62	1	44	0	0	0	0	62	99/64	0.47	3.29	1.74	1.56	77	5.07	426	6.23	184
432.377	1	54	0	0	0	0	78	114/65	1.44	6.08	1.39	3.87	82	5.7	358	6.56	250
416.759	1	33	0	0	0	0	60	125/80	0.83	3.65	1.09	2.01	80	4.94	371	9.52	187
112.265	2	42	1	0	1	1	105	101/77	3.6	4.48	1.11	2.02	106	4.35	299	5.67	171
238.016	2	42	0	1	0	0	92	121/73	0.48	2.29	1.08	0.84	94	4.41	303	6.31	161
4570.32	1	67	1	0	0	0	69	134/62	1.16	5.36	1.35	3.3	76	4.66	243	5.06	241
73.639	2	51	1	0	0	0	70	134/81	0.98	4.8	1.46	2.74	87	4.79	346
21.8227	2	82	1	0	0	0	68	137/58	0.95	4.09	1.31	1.81	88	5.57	288	6.95	176
154.433	2	52	0	0	0	1	68	112/65	1.5	5.31	1.1	3.47	81	5.34
333.193	2	68	0	1	1	0	87	127/76	1.17	5.46	1.39	3.25		8.65	292
24.4013	2	79	1	0	0	0	76	129/65	1.52	4.12	1.26	2.12	111	4.94	361	5.89	183
5.28639	1	77	1	0	1	0	78	180/80	1.31	6.64	1.73	3.81	108	5.24	353	5.75	175
258.067	1	73	1	0	0	0	68	149/83	2.11	5.61	1.45	2.89	80	6.33

## Sheet: healthy control2
	sex	age	hypertension	diabetes
FAM19A5					smoking	dreinking	pulse	BP	TG （0.3-1.92）mmol/L	TC （2.32-5.62）mmol/L	HDL （0.8-1.8）mmol/L	LDL （1.9-3.12）mmol/L	Cr （31-132） umol/L	UA	WBC
346.379	2	70	0	0	1	1	79	114/72	0.66	2.89	0.75	1.79	5.1	293	3.19
189.343	2	51	1	0	1	1	64	140/86	2.5	6.04	1.23	4.19	4.75	500	6.39
93.1013	1	51	0	0	0	0	55	116/59	1.21	4.52	1.45	2.79	4.75	299	5.09
94.0252	1	82	0	0	0	0	70	142/90	1.19	4.53	1.04	2.9	5.12	330	4.77
132.384	1	50	0	0	0	0	65	158/97	1.42	5.18	1.17	3.18	3.95	235	5.76
63.896	1	72	1	0	0	0	79	124/68	0.63	3.17	1.3	1.52	3.38	273	4.23
117.563	1	72	1	0	0	0	56	180/94	0.87	4.42	1.2	2.92	6.32	296	5.59
70.5476	2	56	0	0	0	0	81	145/87	1.39	5.66	1.37	3.77	4.74	360	5.64
30.8669	2	53	0	0	0	0	58	126/80	1	4.36	1.34	2.42	5.77	274	7.09
434.393	2	63	1	1	0	0	100	128/59	2.14	3.74	0.87	2.32	6.98	379	9.63
423.632	1	66	0	0	0	0	60	118/71	0.87	5.11	1.19	3.31	4.96	265	5.07
222.788	2	54	1	0	0	0	74	127/83	1.05	7.09	1.14	5.56	6.1	296	5.7
541.541	1	47	0	0	0	0	58	128/80	1.42	5.81	1.37	3.87	3.81	153	6.66
287.778	1	52	1	0	0	0	81	113/71	1.76	5.02	1.39	2.97	5.7	323	5.75
659.949	1	74	1	0	0	0	71	113/64	0.94	3.84	1.68	1.73	6.37	227	4.33
112.309	2	53	1	0	0	0	83	155/99	3.31	4.54	0.68	2.65	4.79	318	6.38
103.083	1	75	1	0	0	0	56	129/55	1.64	4.2	1.16	2.32	5.88	309	5.43
66.5877	1	52	0	1	0	0	58	133/78	1.71	4.4	1.42	2.48	4.48	199	3.92
223.589	2	68	1	0	0	0	53	154/85	0.74	2.96	1.46	1.17	4.09	269	6.19
268.005	2	74	1	0	1	1	56	156/80	0.8	4.75	1.39	3.13	7.09	269	5.17
268.922	1	82	1	1	0	0	65	168/73	0.87	4.34	1.8	2.36	4.09	237	5.99
277.827	2	52	1	0	0	1	66	115/83	0.92	2.84	1.07	1.51	5.67	461	7.51
1267.67	2	53	1	0	0	0	84	151/84	0.84	3.79	1.39	2.12	6.31	286	5.88
908.169	1	74	1	0	0	0	75	119/52	2.57	4.35	0.99	2.75	4.81	353	4.92
148.668	2	74	0	0	0	0	69	102/60	0.77	5.28	2.22	2.87	4.69	174	3.35
663.274	2	67	0	0	1	1	68	108/64	0.78	4.31	1.6	2.24	9.61	280	5.63
192.554	1	59	1	0	0	0	74	139/63	1.65	3.16	1.39	1.41	6.48	359	7.03
39.0736	2	65	1	0	0	0	64	135/79	1.46	3.81	1.4	2.32	3.8	319.1	5.75
126.402	1	57	1	0	0	0	69	123/68	3.69	5.11	1.05	3.06	5.29	346.9	5.01
4239.19	1	47	0	0	0	0	75	120/76	1.59	4.34	1.52	2.5	3.6	220.2	8.22
276.752	1	69	1	1	0	0	77	169/90	1.38	2.87	1.25	1.37	4.78	255	7.76
501.665	2	49	1	0	0	1	64	150/91	0.89	5.43	1.29	3.69	7.23	360.5
110.16	1	66	1	0	0	0	81	139/80	0.87	5.43	1.45	3.14	5.41	179.8	6.17
58.0711	2	72	0	0	0	0	75	126/71	1.26	4.04	1.18	2.3	6.3	338.1	4.31
261.322	2	63	1	0	0	1	78	130/82	8.27	5.48	0.55	2.05	107.1	265.8	5.12

## Sheet: healthy control3
FAM19A5	sex	age	hypertension	diabetes
					smoking	drinking	pulse	BP	TG	TC	HFL	LDL	Glu	UA	WBC
55.3508	1	60	1	1	0	0	64	131/ 88	2.64	5.02	1.04	3.03	6.15	347	4.57
54.56	2	64	0	0	0	0	76	114/63	0.85	4.5	1.34	2.85	5.59	306	7.4
88.7852	1	47	0	0	0	0	70	106/76	1.48	3.67	1.26	1.91	5.04	266
24.3767	1	60	0	0	0	0	68	141/74	1.45	4.49	0.87	3.09	5.07	225	5.77
59.503	1	51	1	0	0	0	74	127/79	1.53	5.26	1.72	3.17	5.44	320	7.09
938.171	2	80	0	0	0	0	78	140/82	0.58	3.6	1.47	1.93	4.52	155	2.9
41.5155	2	68	0	0	0	1	66	123/79	1.29	4.79	1.44	2.9	4.4	264	5.25
589.715	1	51	0	0	0	0	54	121/80	2.05	5.05	1.19	3.1	5.89	300	6.24
29.9497	1	60	0	0	0	0	61	102/ 69	1.16	4.62	1.28	2.94	4.81	252
625.681	2	66	0	0	1	0	54	115/ 75	0.88	4.22	1.35	2.54	4.91	248	6.37
250.948	1	66	1	0	0	0	76	127/84	1.95	4.89	1.15	3.18	5.28	306	6.79
26.2341	2	49	1	0	0	1	72	133/88	1.32	4.33	0.88	2.85	5.77	472	4.96
132.934	1	42	0	0	0	0	64	117/75	2.7	5.67	1.27	3.9	4.52	404	8.83
18.5997	2	65	0	0	0	0	64	147/75	1.21	3.75	1.11	2.18	4.88	309	5.36
731.559	1	53	0	0	0	0	66	109/57	0.75	3.39	1.7	1.64	4.65	197	8.38
708.319	2	43	1	0	1	0	84	145/86	4.76	5.03	1.03	2.91	4.99	376	8
178.349	1	61	0	0	0	0	68	113/83	1.26	4.46	1.14	2.86	6.15	149	3.79
3451.66	1	81	1	0	0	0	73	157/91	0.9	4.33	1.29	2.6	5.14	286	9.63
434.393	2	65	0	0	0	0	68	125/85	1.01	5.4	1.36	3.76	4.95	290	7.77
222.03	2	57	1	0	0	0	60	149/89	1.77	4.59	0.92	3.2	5.81	308	7.52
200.007	2	75	1	0	0	0	80	165/70	1.38	5.65	1.52	3.57	5.09	340	5.26
267.655	2	68	1	0	1	0	94	160/ 86	1.12	4.37	1.15	2.79	4.54	448	10.83
169.483	1	61	1	0	0	0	62	136/69	0.56	4.41	1.25	2.54	4.75	215	5.63
456.384	1	51	0	0	0	0	50	95/60	0.96	5	2.13	1.99	4.56	289	4.44
659.949	2	60	0	0	1	0	70	118/71	1.3	4.77	1.06	3.23	5.89	405	7.75
12.8251	2	60	1	0	1	0	68	127/83	1.13	4.59	1.45	2.51	5.24	322	7.46
1891.91	1	54	0	0	0	0	16	128/80	0.94	4.71	1.49	3.14	5.94	367	5.94
111.529	1	51	0	0	0	0	64	113/71	1.55	5.42	1.26	3.55	4.95	228	6.31
231.522	1	83	1	1	0	0	84	113/64	1.5	5.8	0.96	4.23	5.65	296	6.78
299.019	1	67	1	0	0	0	71	155/99	1	3.19	0.75	2.16	5.68	173	7.07
46.4753	1	63	0	0	0	0	69	129/55	0.99	4.91	2.27	2.45	5.06	336	5.55
620.553	1	55	0	0	0	0	77	133/78	0.63	3.95	1.51	2.39	4.49	232	5.28
3262.53	2	84	0	0	0	0	72	154/85	0.78	4.01	1.13	2.8	4.86	193	4.89
184.193	1	78	1	0	0	0	70	156/80	1.22	4.66	1.31	3.04	5.27	324	5.24
255.564	2	51	1	0	0	0	70	168/73	1.34	7.5	1.37	5.2	9.93	380	4.61
275.093	1	49	0	0	0	0	46	115/83	0.81	4.46	1.34	2.51	4.54	235	6.43
114.852	2	56	1	0	0	0	74	151/84	2.07	3.71	0.96	1.96	5.31	279	7.05
693.287	1	65	1	0	0	0	60	119/52	2.05	7.74	1.36	5.36	9.04	295	5.07
114.436	1	60	1	1	0	0	64	102/60	1.02	4.62	1.57	3.05	11.83	227	5.26
136.532	2	53	0	0	1	0	76	108/64	0.85	3.66	1.01	2.49	6.13	353	5.72
326.59	2	63	1	0	0	0	106	139/63	0.9	3.15	1.27	1.7	5.47	203	11.18
1126.12	2	76	0	0	0	0	62	135/79	2.2	5.34	1.22	4.11	4.04	406	6.51
83.7297	1	66	1	0	0	0	67	157/92	1.26	5.21	1.54	3.73	4.44	235
157.707	2	54	0	0	0	0	58	124/70	1.75	3.79	1.05	2.62	4.86	279	6.76
210.94	2	57	0	0	0	0	64	160/ 84	1.37	4.35	0.81	3.44	5.22	327	5.58
87.2534	1	47	0	0	0	0	78	118/ 78	0.97	4.01	1.3	2.79	5.63	312	6.64
130.231	1	61	0	0	0	0	80	95/ 52	0.9	5.73	1.81	3.15	4.66	290	5.42
9.79461	2	54	1	1	0	0	74	118/ 78	2.79	4.26	0.92	3.49	6.27	557	6.91
176.263	1	81	0	0	0	0	88	120/66	1.97	5.98	1.39	3.45	4.91	239	6.59
125.075	2	48	1	0	0	0	78	135/90	2.55	4.76	1.31	2.9	7.57	460
1147.42	1	51	1	0	0	0	68	114/73	2.99	6.54	1.29	3.67	4.83	328	6.43
163.959	1	68	1	0	0	0	62	137/ 67	1.48	5.38	1.55	3.51	5.31	261	5.28
147.293	1	64	0	0	0	0	68	125/74	1.81	6.04	1.43	3.87	4.94	250	4.19
1869.05	1	59	0	0	0	0	73	118/76	1.23	4.67	1.23	3.01	5.01	255	5.87
58.6755	1	64	1	0	0	0	76	147/87	1.69	5.45	1.39	3.7	4.89	333	4.11
41.8178	1	78	1	1	0	0	75	160/ 84	2.42	5.75	1.02	3.85	11.91	244	7.03
123.163	1	70	0	0	0	0	66	147/78	91	5.93	1.53	4.15	5.42	216	5.24
2230.95	1	33	0	0	0	0	60	131/ 85	2.02	3.3	1.08	1.74	4.1	367	6.47
314.768	1	62	1	0	0	0	68	122/73	2.75	4.84	1.05	2.94	5.2	257	5.61
251.867	1	84	1	1	0	0	88	188/98	3.16	5.1	0.86	2.97	5.09	370
380.993	2	43	0	0	1	0	60	106/ 70	2.88	4.72	0.77	2.88	4.56	381
331.105	2	59	1	0	0	0	60	157/92	1.1	5.65	1.12	4.12	4.31	417	7.15
359.474	1	53	1	0	0	0	60	124/70	1.32	4.65	1.06	3.09	4.41	184	5.27
48.9558	1	66	0	0	0	0	64	136/ 79	0.91	4.26	1.23	2.93	5.17	260	4.62
232.696	1	73	1	0	0	0	64	152/76	2.2	5.97	0.99	4.11	4.27	300	6.14
306.861	2	51	0	0	1	0	70	115/72	3.95	3.21	0.61	1.58	4.51	374	15.5
254.515	1	66	0	0	0	0	64	105/60mmHg	1.59	6.11	1.33	4.5	6.97	269	6.55
112.775	2	85	1	1	0	0	67	141/62 mmHg	1.72	3.12	0.6	1.67	4.23	439	5.06
106.264	2	86	0	0	0	0	80	140/70mmHg	1.3	3.08	0.95	1.84	6.03	335	7.73
295.018	2	64	1	1	1	0	67	131/83 mmHg	2.12	4.44	0.9	2.69	7.67	417	5.86
148.125	1	60	0	0	0	0	60	126/67mmHg	0.82	5.26	1.62	3.16	4.68	239	4.56
152.376	2	56	0	0	0	0	64	162/ 91 mmHg	0.71	3.75	1.12	2.26	5.15	299	6.09
386.202	2	70	0	0	0	0	59	153/84 mmHg	1.2	5.27	1.17	3.75	4.81	591
131.78	1	75	1	0	0	0	58	132/65mmHg	1.89	5.61	0.81	3.81	5.77	250	5.03
161.486	1	63	1	0	0	0	66	132/74 mmHg	0.88	4.82	1.39	3.62	5.41	351	8.23
213.075	1	69	1	0	0	0	60	184/82 mmHg	2.19	4.57	0.86	3	5.42	213	7.17
333.173	1	50	0	0	0	0	56	100/ 59 mmHg	0.85	4.53	1.4	3.17	5.08	224	6.45
45.4291	2	83	0	0	1	0	52	147/60mmHg	0.74	3.97	1.13	2.73	4.99	411	4.38
115.001	1	56	0	1	0	0	66	93/ 63 mmHg	3.83	5.22	1	3.2	7.73	236	6.04
35.5991	1	53	0	0	0	0	66	102/ 74 mmHg	0.92	5.32	1.2	3.53	5.02	268	3.33
245.599	1	55	0	0	0	0	52	117/61mmHg	1.2	5.04	1.51	3.03	4.64	300	4.6
324.764	2	55	1	0	1	0	72	170/ 105 mmHg	2.49	5.39	0.92	4.07	6.48	387	12.06
357.824	1	70	1	0	0	0	66	167/79mmHg	1.7	4.58	1.32	2.94	6.07	421	7.73
96.8398	2	60	1	0	0	0	65	165/92mmHg	1.15	4.21	1.06	2.93	4.28	481	4.81
217.646	1	67	0	0	0	0	55	133/ 78 mmHg	2.38	6.4	1.12	4.14	4.7	296	4
4242.02	1	53	1	0	0	0	82	130/90mmHg	1.82	3.28	0.72	2.49	4.83	283	13.5
317.36	1	53	0	0	0	0	56	106/64mmHg	2.45	5.26	0.93	3.6	4.76	235	5.8
96.3389	1	89	1	0	0	0	84	184/112	1.65	6.14	1.34	4.3	4.34	307	8.31
127.886	1	76	1	1	0	0	63	130/64	1.4	5.01	1.34	4.09	6.14	426	4.91
278.197	2	61	1	0	0	0	74	153/ 94	1.27	5.18	1.48	3.3	6.5	316	7.77
129.427	1	36	0	0	0	0	64	120/ 80
568.438	1	51	0	0	0	0	61	156/96	1.54	5.36	1.51	3.69	4.32	388
20.6458	1	66	1	0	0	0	48	174/95	2.17	6.2	1.15	4.16	5.51	457	5.94
59.7917	1	66	0	0	0	0	69	184/93	1.67	5.16	1.14	3.52	4.65	332	4.99
66.4855	1	57	0	0	0	0	53	119/80	0.66	4.86	1.82	2.93	4.65	0.94	4.09
411.069	1	57	0	0	0	0	61	114/66	0.8	3.01	1	1.81	4.66	267	2.96
496.635	1	67	1	0	0	0	70	164/97	1.32	6.1	1.68	4.2	5.47	224	9.91
304.561	2	36	1	0	0	0	72	137/82	2.56	3.96	1	2.64	5.83	383	6.18
225.203	1	58	0	0	0	0	68	124/61	2.46	6.13	1.12	4.4	4.95	269	6.96
560.238	2	76	1	0	0	0	57	175/80	1.34	2.41	0.73	1.38	5.34	488
54.0851	2	57	1	1	0	0	76	146/87	1.15	4.41	1.3	2.9	13.69	179	5.67
333.389	2	79	1	0	0	0	50	143/ 64	0.65	3.32	1.12	2.04	5.04	240	7.31
150.99	1	71	0	0	0	0	60	126/ 60							3.1
88.7854	2	60	1	0	0	0	60	117/80	1.5	5.68	1.3	3.85	5.46	333	6.24
4886.6	2	42	0	0	0	0	68	138/82	1.13	4.02	1.04	2.66	3.87	270	6.86
4345.28	1	75	0	0	0	0	66	142/73	0.71	6.55	2.1	3.78	5.06	222	3.53
214.854	1	61	1	1	0	0	76	174/90	1.79	6.16	1.17	4.54	10.16	348	11.04
169.303	1	59	0	0	0	0	71	132/78	1.09	4.62	1.57	2.5	6.14	355	6.41
1395.02	1	79	1	1	0	0	88	148/76	1.62	3.63	0.86	2.17	6.35	289	9.56
253.186	1	79	1	0	0	0	70	179/77	1.14	4.26	1.38	2.03	5.9	379	6.83
239.665	1	75	1	0	0	0	60	153/ 81	0.7	3.56	1.19	2.05	5.11	282	5.81
184.283	1	60	1	0	0	0	72	160/ 95 mmHg	1.66	6.12	1.07	4.23	5.05	222	6.67
323.909	2	68	1	1	1	0	62	121/58 mmHg	0.74	4.13	1.34	2.36	16.54	329
19.4593	1	66	1	1	0	0	60	137/74 mmHg	1.16	4.11	1	2.22	4.64	283	3.5
107.218	1	66	1	0	0	0	50	169/69mmHg	1.18	4.58	1.09	2.88	5.56	190	4.69
373.219	1	36	1	0	0	0	64	168/101mmHg	1.35	5.78	1.26	4.01	5.2	338	5.11
227.987	2	43	0	0	1	1	77	133/83 mmHg	2.82	5.56	0.99	3.48	5.26	387	8.62
293.171	1	83	0	0	0	0	76	159/69mmHg	0.75	4.47	1.91	2.24	4.56	376	5.06
114.211	2	50	1	0	1	1	79	146/ 93 mmHg	3.48	4.62	0.88	2.42	4.84	586	6.87
248.689	1	80	1	0	0	0	78	134/79mmHg	1.09	9.3	1.38	5.97	4.68	294	3.84
2057.51	1	60	1	1	0	0	66	118/68mmHg	2.56	5	0.94	2.66	5.31	336	7.11
126.857	1	50	0	0	0	0	66	128/84 mmHg	0.75	5.2	1.05	3.78	4.53	318	6.32
174.07	1	72	1	1	0	0	68	141/70 mmHg	3.01	4.44	1.26	2.42	10.4	374	8.1
586.891	2	63	0	0	1	1	70	105/57 mmHg	1.41	3.56	0.74	2.48	5.09	287
50.3463	1	61	0	0	0	0	64	141/75mmHg	1.77	5.45	1.43	3.42	4.71	311	7.23
66.0917	1	69	1	1	0	0	75	165/90 mmHg	1.37	6.42	1.84	4.12	10.79	265	8.47
560.714	1	66	1	0	0	0	72	181/92mmHg	1.6	6.09	1.77	3.5	5.56	475	7.74
352.334	1	60	1	0	0	0	70	175/97 mmHg	2.08	5.22	0.93	3.3	4.88	272	4.68
76.3345	2	66	0	0	0	0	76	118/ 71 mmHg	0.69	4.08	1.29	2.31	5.02	358	4.93
158.446	1	68	1	1	0	0	81	169/69mmHg	4.17	4.83	0.85	1.55	5.52	533	6.15
89.7377	1	59	1	1	0	0	84	150/83mmHg	1.68	5	1.03	3.44	13.79	315	6.49
53.1006	1	52	1	0	0	0	72	135/76mmHg	1.16	4.8	1.18	2.89	6.21	385	6.08
111.514	1	43	0	1	0	0	82	118/ 66 mmHg	1.08	4.6	1.23	2.76	12.17	247
628.326	1	91	1	0	0	0	64	180/66mmHg	0.92	4.89	1.56	2.7	3.91	239	6.45
237.34	2	51	1	0	0	1	82	155/103mmHg	0.84	5.43	1.38	3.54	5.4	349	5.21
194.602	2	72	1	0	0	0	54	1134/76mmHg	1.45	3.83	0.96	2.12	6.63	301	4.49
69.8335	2	47	1	0	1	1	74	123/80mmHg	1.36	4.27	1.53	2.13	4.67	439	4.15
