# Supplementary material for: Increased level of FAM19A5 is associated with cerebral small vessel disease and leads to a better outcome
Source: PeerJ. 2022 Mar 8;10:e13101. doi: 10.7717/peerj.13101 (PMC8916029; doi:10.7717/peerj.13101)
Supplement: Supplemental Information 2 [file peerj-10-13101-s002.xlsx]

## Sheet: Sheet1
2020.11.10
	1	2	3	4	5	6	7	8	9	10	11	12
A	2.3563	0.9932	0.4346	0.2324	0.0944	0.0034	0.0046	0	0.8041	0.3164	2.0817	0.0099
B	0.0509	1.6696	1.0929	0.0393	0.2773	0.0315	0.0307	0.6445	1.0242	0.4939	1.8578	0.0182
2020.11.15
<>	1	2	3	4	5	6	7	8	9	10	11	12
A	2.433	1.222	0.705	0.363	0.192	0.084	0.085	0.227	0.435	0.158	0.304	0.091
B	2.528	0.325	0.155	0.085	0.1	0.086	0.094	1.067	0.115	0.073	0.062	0.064
C	0.207	2.221	2.914	2.725	1.243	0.684	0.269	1.108	0.152	0.795	0.065	0.063
2020.11.19
	1	2	3	4	5	6	7	8	9	10	11	12
A	2.2909	1.0994	0.5762	0.3036	0.1769	0.0943	0.0906	0.1017	0.8426	0.1102	0.7694	1.6887
B	1.0042	0.0799	0.0758	0.0714	0.0722	0.0775	2.2148	0.0822	0.076	0.1326	0.584	0.0872
C	2.6743	0.2595	0.0723	0.6103	1.1155	0.0985	2.3963	2.2863	0.0671	0.1212	0.092	0.2427
2020.11.25
	1	2	3	4	5	6	7	8	9	10	11	12
A	2.4734	1.3469	0.7824	0.4218	0.2427	0.1407	0.0659	0.2297	0.2059	0.524	0.1059	0.1063
B	0.1938	0.0877	0.1632	0.2401	0.241	0.1245	2.0654	0.3656	2.1198	0.2329	0.1168	0.1401
C	0.133	0.156	0.0971	0.1229	0.119	0.2053	0.1273	0.3877	0.0796	0.1042	0.1084	0.8574
D	0.135	0.3548	0.1283	0.1093	0.8565	0.2109	0.0949	0.3201	0.1552	0.2755	0.1048	0.1576
E	0.235	0.1243	0.3066	0.1549	0.1174	0.726	0.0953	0.7204	0.3828	0.2737	0.2927	0.1557
F	0.7586	0.1954	0.117	0.1368	0.0706	0.1302	0.1528	0.1258	0.5005	0.0959	0.3483	2.5176
2020.11.27
	1	2	3	4	5	6	7	8	9	10	11	12
8	2.2909	1.0994	0.5762	0.3036	0.1769	0.0943	2.3963	2.2863	0.0671	0.1212	0.092	0.2427
2020.12.1
	1	2	3	4	5	6	7	8	9	10	11	12
A	2.4939	2.0563	0.1485	0.1143	0.5791	0.1177	0.9093	0.148	0.0977	0.4242	0.3662	0.1306
B	1.3947	0.1779	0.1766	0.0972	0.3067	0.3188	0.1081	0.3452	0.5946	0.3261	0.277	0.1348
C	0.8207	0.1847	0.1001	0.1296	0.1274	0.1398	0.2339	0.1138	0.0988	0.5113	0.1228	0.1
D	0.4994	0.8309	0.1391	0.3993	0.4473	0.2267	0.2051	0.1299	0.1	0.217	0.1755	0.1712
E	0.2854	0.2055	0.1195	0.3698	0.3112	0.4048	0.2543	1.8414	0.0911	0.1192	0.1897	0.3054
F	0.153	1.0826	0.1137	0.1528	0.3006	0.2393	0.1963	0.1881	0.1531	0.1255	0.1249	0.1475
G	0.0642	0.2055	0.117	0.1279	0.1319	0.0932	0.1498	0.7107	0.218	0.1224	1.054	0.0864
H	0.2071	0.4326	0.1201	1.3006	0.3914	0.1467	0.1334	0.1995	0.0878	0.1286	0.0911	0.139
2020.12.5
Temperature(¡C)	1	2	3	4	5	6	7	8	9	10	11	12
A	2.565	0.2132	0.3123	2.3908	0.1155	0.0457	0.0578	2.051	0.7415	0.7359	0.3392	0.0558
B	1.5073	0.0885	0.071	0.1254	0.6224	0.1129	0.0651	0.0552	0.0371	0.2702	0.0721	0.0648
C	0.916	0.2035	0.2056	0.3038	0.0482	2.3655	0.0812	0.1005	2.324	2.7094	0.0616	0.0572
D	0.4499	0.5711	0.1536	0.2121	0.1106	0.0715	0.7268	0.1995	0.1534	2.3767	0.2223	0.0151
E	0.2579	0.1725	2.031	0.2501	0.0894	0.1519	0.2537	0.522	0.0711	0.2047	0.0834	0.0527
F	0.0951	0.1772	0.055	0.1264	0.0967	0.2364	0.2452	0.1089	0.8249	0.0699	2.8485	0.0896
G	0	0.5037	0.0737	0.251	0.1249	0.123	0.0769	0.3551	0.0576	0.2966	0.2183	0.0253
H	0.0472	0.1182	0.0882	0.0552	0.0764	0.1286	0.147	1.5809	0.1227	1.7842	0.0567	0.0305
Temperature(¡C)	1	2	3	4	5	6	7	8	9	10	11	12
A	2.6669	0.3272	0.0758	0.6305	0.0827	0.056	0.3309	0.1177	0.0302	0.2811	1.3646	0.1215
B	1.6785	0.1584	0.3226	0.1752	0.0637	0.0801	0.1767	0.0213	0.0352	0.1017	0.0678	0.3146
C	0.9243	0.0984	0.1388	0.1859	0.1032	0.037	0.0675	2.0781	0.1254	1.6815	0.0392	0.1318
D	0.4931	0.2765	0.0954	0.1194	0.0643	0.0708	0.0617	0.1699	0.296	0.3744	0.4043	1.2557
E	0.2592	0.1079	0.0788	0.0858	0.0533	0.0412	0.0387	0.0316	0.0856	0.2723	0.1922	0.5428
F	0.1	0.1669	0.1934	0.0701	0.067	0.0161	0.1645	0.0311	0.0926	0.0678	1.6093	0.0577
G	0	0.1105	1.2044	0.2513	0.2127	0.2598	0.7478	0.0527	0.068	0.1818	0.0605	0.5128
H	0.3277	0.6466	0.1174	0.9552	0.1157	0.1365	0.0903	0.2503	0.0652	0.1378	0.1235	1.5134
2020.12.6
	1	2	3	4	5	6	7	8	9	10	11	12
A	2.3996	0.2208	0.2923	0.1407	0.0477	0.0562	0.0138	0.0662	0.0082	0.1342	0.0649	0.9985
B	1.3669	0.0794	2.5047	0.5079	0.2758	0.2705	0.0308	0.011	0.8582	0.0575	0.087	0.1844
C	0.7349	0.0979	0.1534	0.1965	0.2827	0.2451	0.0221	0.3478	0.0559	0.0573	2.8342	0.1608
D	0.4017	0.1339	0.2144	0.2718	0.2804	0.4078	0.2822	0.3371	0.1683	0.5266	0.5361	0.0257
E	0.2092	0.0971	0.4238	0.2987	0.0834	0.2267	0.0165	0.088	0.0245	0.0425	0.0811	0.1493
F	0.0697	0.071	0.0925	0.1212	0.1601	0.1746	0.2989	1.4706	0.0187	0.0781	0.0731	0.1244
G	0	0.0685	0.2835	0.1615	0.0221	0.5919	0.1227	0.1089	0.0908	0.1036	0.0304	0.0565
H	0.1088	0.1176	0.3027	0.069	0.2157	0.2532	0.0147	0.2199	0.1249	0.0442	0.0615	0.0735
Temperature(¡C)	1	2	3	4	5	6	7	8	9	10	11	12
A	2.6204	0.0855	0.0528	0.0374	0.119	0.2845	0.148	0.3803	0.159	0.1547	0.1049	0.597
B	1.4494	0.1115	0.1138	0.2529	0.1517	0.0424	0.0355	0.1572	0.0822	0.0183	0.1249	0.0616
C	0.8031	0.1717	1.8808	0.1574	0.0616	0.0306	2.2649	0.0134	0.0404	0.3034	0.031	0.0524
D	0.4147	0.0267	0.1638	0.1176	0.1294	0.3177	1.3397	0.0256	0.0888	0.0517	0.0625	0.1616
E	0.2137	0.062	0.1442	0.0802	0.9855	0.1237	0.2151	0.0852	0.0559	0.0616	1.4413	0.0603
F	0.0813	0.0217	0.0693	2.116	0.068	0.1022	0.4308	0.0929	0.2197	0.0596	0.7212	0.2983
G	0	0.1675	0.2883	0.097	0.0292	0.0391	0.0302	0.0364	0.1184	1.9689	0.0874	0.0963
H	0.0809	0.184	0.034	2.1458	0.0372	0.0798	0.3131	2.2267	0.1022	0.1509	0.0884	0.0453
2020.12.7
Temperature(¡C)	2.5742	0.2662	0.3866	0.1629	0.1792	1.3897	0.2202	0.69	0.547	0.2542	0.1254	0.1346
A	1.3997	0.3687	0.1935	0.4888	0.633	0.1938	0.1235	0.1255	1.6973	0.111	0.2346	0.0816
B	0.7994	0.2443	0.2783	0.1713	0.2021	0.0945	0.1444	0.9958	0.3217	0.8682	0.153	0.1214
C	0.4251	0.2203	0.1504	0.16	0.118	0.1063	0.325	0.0751	0.1422	0.1975	0.0875	0.2461
D	0.2627	0.2384	0.1034	0.1805	0.1084	0.1284	1.9225	0.1233	0.0943	0.1613	0.1116	0.3823
E	0.1356	0.1479	0.4064	0.1909	0.1026	0.1025	0.0739	1.2946	0.1051	1.377	1.1455	0.1844
F	0.0856	0.3355	0.3313	0.12	0.1191	0.1171	0.0794	0.19	0.3137	0.7922	0.0934	0.2648
G	0.4815	0.1408	0.242	0.2153	0.2564	0.3928	0.4343	0.345	0.31	0.0999	0.1553	0.0645
Temperature(¡C)	1	2	3	4	5	6	7	8	9	10	11	12
A	2.6299	1.683	0.1038	0.4794	1.2518	0.3491	2.2015	0.131	0.1487	0.1274	0.1861	0.3122
B	1.323	0.1752	1.5715	0.1048	0.1724	0.6232	0.2349	1.1485	0.1572	0.1072	0.1346	0.3612
C	0.791	0.562	0.1572	0.1959	0.1761	0.1571	0.1274	0.1038	0.0846	0.1025	0.2029	0.404
D	0.3972	0.3895	0.5118	0.1049	0.0853	0.1552	0.1081	0.274	1.4328	3.0584	0.1473	0.215
E	0.2151	0.2051	0.315	0.1249	0.1478	2.4839	0.2159	0.1464	0.0866	0.0846	0.388	1.8986
F	0.1196	0.1943	0.1073	0.0919	0.2069	0.1506	0.0848	0.1554	0.0668	0.0734	0.2068	0.1706
G	0.0567	0.108	0.1692	0.4234	0.1496	0.1504	0.1051	0.0884	0.1342	0.1194	0.1622	0.2042
H	0.3621	0.1496	0.1905	0.1117	0.9767	0.1083	0.1538	0.1266	0.14	0.1436	0.1918	0.1288
2020.12.13
	1	2	3	4	5	6	7	8	9	10	11	12
A	2.4048	0.1684	0.1948	0.1625	0.2037	0.2328	0.5482	0.1716	0.1641	1.6072	0.1922	0.1933
B	1.295	0.1599	0.23	0.1169	0.1793	0.187	0.4066	0.5071	0.1259	0.1554	0.17	0.4576
C	0.8229	0.1452	0.1424	0.1585	0.1526	0.17	0.1269	2.0779	0.1634	0.1754	0.4721	0.2257
D	0.4707	0.3312	0.1238	0.1536	0.1839	0.1455	0.1652	0.1689	0.1434	0.1944	0.1761	0.1743
E	0.3572	0.1824	0.2718	0.166	0.2009	0.1755	0.161	0.1633	0.1256	0.21	0.1957	0.1585
F	0.2101	0.1738	0.2599	0.1336	0.3621	0.3957	0.135	0.1637	0.1785	0.1804	0.2025	0.2255
G	0.1817	0.1437	0.2195	0.1307	0.1384	0.1599	0.1718	0.1581	0.1512	0.4497	0.1441	0.2545
H	0.165	0.1628	0.1362	0.1203	0.1625	0.2394	0.2667	0.139	0.2421	1.8235	0.2225	0.2229
